# Supplementary material for: Reduction of neutral lipid reservoirs, bioconversion and untargeted metabolomics reveal distinct roles for vitamin K isoforms on lipid metabolism
Source: Royal Society of Chemistry journal article supplement (doi:10.1039/d3fo02915h), 2024-01-01
Supplement: d3fo02915h1.pdf [file d3fo02915h1.pdf]

## Supplementary Information

### **Reduction of neutral lipid reservoirs, bioconversion and untargeted metabolomics reveal distinct roles for vitamin K isoforms on lipid metabolism**

---

<sup>a, c</sup>*Interdisciplinary Centre of Marine and Environmental Research (CIIMAR/CIMAR), University of Porto, Avenida General Norton de Matos, s/n, 4450-208 Matosinhos, Portugal*

<sup>b, c</sup>*FCUP, Faculty of Science, Department of Biology, University of Porto, Rua do Campo, Alegre, 4169-007 Porto, Portugal*

<sup>c</sup> *\*Corresponding author: Ralph Urbatzka; rurbatzka@ciimar.up.pt; Tel.: +351-223-401-818*

Natália Gonçalves Silva<sup>ab</sup>, Marco Preto<sup>a</sup>, Vitor Vasconcelos<sup>ab</sup> and Ralph Urbatzka<sup>\*a</sup>

## List of Contents

### Appendix A. General Experimental Procedures.

### Appendix B. Isolation and structural elucidation of OH-Phylloquinone.

- 1.1. Cyanobacterial Growth, Extraction and Fractionation
- 1.2. Compound Isolation and Structure Elucidation

**Table S 1**  $^1\text{H}$  and  $^{13}\text{C}$  NMR data ( $\delta$ , ppm) of 5 $^{11}$ -OH-Phylloquinone at 600 MHz in DMSO-*d*<sub>6</sub> (deuterated dimethyl sulfoxide).

**Figure S 1** Key 13C-1H HMBC and 1H-1H COSY correlations for 5 $^{11}$ -OH-Phylloquinone

**Figure S 2**  $^1\text{H}$  NMR spectrum of 5 $^{11}$ -OH-Phylloquinone in DMSO-*d*<sub>6</sub> (600 MHz).

**Figure S 3**  $^{13}\text{C}$  NMR spectrum of 5 $^{11}$ -OH-Phylloquinone in DMSO-*d*<sub>6</sub> (600 MHz).

**Figure S 4** HSQC spectrum of 5 $^{11}$ -OH-Phylloquinone in DMSO-*d*<sub>6</sub> (600 MHz).

**Figure S 5** HMBC spectrum of 5 $^{11}$ -OH-Phylloquinone in DMSO-*d*<sub>6</sub> (600 MHz).

**Figure S 6**  $^1\text{H}$ - $^1\text{H}$  COSY spectrum of 5 $^{11}$ -OH-Phylloquinone in DMSO-*d*<sub>6</sub> (600 MHz).

**Figure S 7** ROESY spectrum of 5 $^{11}$ -OH-Phylloquinone in DMSO-*d*<sub>6</sub> (600 MHz).

**Figure S 8** Fourier Transform Infrared Spectroscopy (FT-IR) spectrum of 5 $^{11}$ -OH-Phylloquinone (using potassium bromide IR sample card).

**Figure S 9** UV–visible absorption spectrum of 5 $^{11}$ -OH-Phylloquinone in MeOH.

**Figure S 10** LC-ESI-HRMS/MS spectra of vitamin K isoforms in the positive ion mode, showing the retention time (RT) and major detected adducts from MS1 data and fragmentation from MS2 data. (i) Phylloquinone, (ii) Menaquinone (MK-4), (iii) Menadione and (iv) OH-PhQ.

### Appendix C. Biological effects of exposed zebrafish larvae to vitamin K isoforms.

#### 1.1. Zebrafish maintenance

**Figure S 11** EC<sub>50</sub> values determination in the zebrafish Nile red fat metabolism assay. Seven concentrations of each compound were exposed for 48 h, together with solvent control DMSO (dimethyl sulfoxide 0.1%) and positive control REV (resveratrol 50  $\mu\text{M}$ ). Values are expressed as percentage of mean fluorescence intensity (MFI) relative to the DMSO group and are derived from six to eight individual larvae per treatment group. The data are represented as box-whisker plots from the 5th to 95th percentiles. Asterisks highlight significant altered fluorescence intensities that indicate changes of neutral lipid level (\*\*\*\*  $p < 0.0001$ ; \*\*\*  $p < 0.001$ ; \*\*  $p < 0.01$ ; \*  $p < 0.05$ ).

**Table S 2.** Parameters used in MZmine 2 for mass feature detection, chromatogram building, feature alignment and filtering for further MetaboAnalyst analyses.

**Figure S 12** Statistically significant metabolites from exposed zebrafish larvae to the vitamins K family in comparison with control samples, from targeted extraction. Data is presented as Partial Least Squares-Discriminant Analysis (PLS-DA) plot and Venn's diagram with a statistical significance of 0.05 (ANOVA - T-test using Tukey's/Fisher's post hoc test).

**Table S 3** Concentration, major adducts, 4 main fragments (major in bold), ionization intensities and RT (retention time) of the different standard compounds detected by ESI source (positive ion mode).

**Figure S 13** Standard calibration curves of the vitamins K family (OH-PhQ, K1, K2 and K3) analyzed by LC-ESI-HRMS/MS in the positive ion mode using the same methodology as described under "Material and Methods: General Experimental Procedures". The results are presented as logarithmic concentrations ( $\mu\text{M}$ ) and logarithmic mean intensity ionizations (MII) of the 4 isoforms.

**Figure S 14** Statistically significant and enriched metabolites from zebrafish larvae exposed to different vitamins K family, in comparison with control samples, from both extraction procedures. Data presented as volcano plot with a statistical significance of 0.05 (ANOVA - T-test using Tukey's/Fisher's post hoc test) and a threshold of 4-fold difference ( $2 \log_2\text{FC} \geq 2.0$ ). In each representation is shown the class of the identified top 20 statistically significant and enriched ( $2 \log_2\text{FC} \geq 5$ ) compounds. Boxes green and purple represent the top selected metabolites, up/down, respectively.

**Figure S 15** Statistically significant metabolic pathways resulting from the supplementation of vitamins K family: OH-PhQ, K1, K2 and K3. The two extraction procedures, general (GE) and targeted extraction (TE), were analyzed and compared. In bold and grey shade are listed the pathways whereas below are the class of compounds involved in such pathways. All indicated pathways are up-regulated.

**Table S 4** Identification of statistically significant and enriched metabolites from exposed zebrafish larvae to OH-PhQ vitamin, in comparison with control samples, from general extraction. Is shown the putative identification ( $\Delta$  ppm < 5) chemical taxonomy (class and subclass) of the top 20 statistically significant and enriched compounds (p-value  $\leq$  0.05, with inclusion of all  $\log_2FC \geq 5$ ).

**Table S 5** Identification of statistically significant and enriched metabolites from exposed zebrafish larvae to K1 vitamin, in comparison with control samples, from general extraction. Is shown the putative identification ( $\Delta$  ppm < 5) chemical taxonomy (class and subclass) of the top 20 statistically significant and enriched compounds (p-value  $\leq$  0.05, with inclusion of all  $\log_2FC \geq 5$ ).

**Table S 6** Identification of statistically significant and enriched metabolites from exposed zebrafish larvae to K2 vitamin, in comparison with control samples, from general extraction. Is shown the putative identification ( $\Delta$  ppm < 5) chemical taxonomy (class and subclass) of the top 20 statistically significant and enriched compounds (p-value  $\leq$  0.05, with inclusion of all  $\log_2FC \geq 5$ ).

**Table S 7** Identification of statistically significant and enriched metabolites from exposed zebrafish larvae to K3 vitamin, in comparison with control samples, from general extraction. Is shown the putative identification ( $\Delta$  ppm < 5) chemical taxonomy (class and subclass) of the top 20 statistically significant and enriched compounds (p-value  $\leq$  0.05, with inclusion of all  $\log_2FC \geq 5$ ).

**Table S 8** Identification of statistically significant and enriched metabolites from exposed zebrafish larvae to OH-PhQ vitamin, in comparison with control samples, from targeted extraction. Is shown the putative identification ( $\Delta$  ppm < 5) chemical taxonomy (class and subclass) of the top 20 statistically significant and enriched compounds (p-value  $\leq$  0.05, with inclusion of all  $\log_2FC \geq 5$ ).

**Table S 9** Identification of statistically significant and enriched metabolites from exposed zebrafish larvae to K1 vitamin, in comparison with control samples, from targeted extraction. Is shown the putative identification ( $\Delta$  ppm < 5) chemical taxonomy (class and subclass) of the top 20 statistically significant and enriched compounds (p-value  $\leq$  0.05, with inclusion of all  $\log_2FC \geq 5$ ).

**Table S 10** Identification of statistically significant and enriched metabolites from exposed zebrafish larvae to K2 vitamin, in comparison with control samples, from targeted extraction. Is shown the putative identification ( $\Delta$  ppm < 5) chemical taxonomy (class and subclass) of the top 20 statistically significant and enriched compounds (p-value  $\leq$  0.05, with inclusion of all  $\log_2FC \geq 5$ ).

**Table S 11** Identification of statistically significant and enriched metabolites from exposed zebrafish larvae to K3 vitamin, in comparison with control samples, from targeted extraction. Is shown the putative identification ( $\Delta$  ppm < 5) chemical taxonomy (class and subclass) of the top 20 statistically significant and enriched compounds (p-value  $\leq$  0.05, with inclusion of all  $\log_2FC \geq 5$ ).

## **Appendix A: General Experimental Procedures**

One- and two-dimensional (1D and 2D) NMR spectra were acquired with a 600-MHz Bruker Avance III HD (Bruker, Karlsruhe, Germany) equipped with a 5 mm cryoprobe, for samples dissolved in DMSO-*d*<sub>6</sub> for <sup>1</sup>H and <sup>13</sup>C experiments. Both chemical shifts (<sup>1</sup>H and <sup>13</sup>C) are expressed in  $\delta$  (ppm), referenced to the solvent used and the proton coupling constants *J* are given in hertz (Hz). Spectra were assigned using appropriate COSY, HSQC, HMBC and ROESY sequences. LC-ESI-HRMS (liquid chromatography-high resolution electrospray ionization tandem mass spectrometry) data were acquired on a system composed of an UltiMate 3000 HPLC coupled with Q Exactive Focus Hybrid Quadrupole-Orbitrap Mass Spectrometer (Thermo Fisher Scientific, Waltham, MA, USA) and controlled by Xcalibur 4.1. Then, 5  $\mu$ L was separated using an ACE Ultracore 2.5 SuperC18 (ACE, United Kingdom), 75 x 2.1 mm inner diameter (id) with the column oven set to 40 °C. The samples were eluted at 0.35 mL/min over a gradient of 99.5 % solvent A (95% H<sub>2</sub>O, 5% MeOH with 0.1% v/v formic acid) to reach 10 % solvent B (95% isopropanol, 5% MeOH with 0.1% v/v formic acid) during 0.5 min, followed by an increase to 60% solvent B in 8 min and by another increase to 90% in 1 min, maintaining that isocratic conditions for over 6 min and returning to the initial conditions over 1.5 min, before equilibrating for a final 2 min. The UV absorbance of the eluate was monitored at 206 nm, 248 nm and 254 nm. LC-HR-ESI-MS/MS was obtained in positive ion mode using a capillary voltage of the Heated Electrospray Ionization (HESI) of 3.8 kV, temperature of 300 °C, full MS scan at the resolution of 70,000 FWHM (full width at half maximum; range of 150–2000 *m/z*), and data-dependent MS<sup>2</sup> (ddMS<sup>2</sup>, Discovery mode) at the resolution of 17,500 FWHM (isolation window used was 3.0 amu and normalized collision energy was 35). The sheath gas and auxiliary gas flow rate were at 35 and 10 (arbitrary unit as provided by the software settings).

UV-Visible (UV-Vis) spectra were acquired on a VWR UV 1600 equipped with a 1 cm path length quartz cuvette. The sample was eluted in methanol (MeOH) at a 0.24 mg/mL and scanned at room temperature from 190 to 800 nm with range of 0.5 nm and analyzed using M Wave software. Fourier Transform Infrared Spectroscopy (FT-IR) spectra was also acquired on a Thermo Scientific Nicolet iS5 (Omnic software), and the sample scanned forty-eight times at a concentration of 0.24 mg/mL, using a real crystal IR card with addition of potassium bromide solution. Optical rotations were measured on a Jasco P2000 polarimeter (10 measurements, 589 nm) using a 1 mL sample cell, at room temperature. The sample was dissolved in MeOH at concentration of 0.5 mg/mL. The electronic circular dichroism (ECD) spectrum was acquired on a J-1500 Spectrometer (JASCO).

Normal-phase HPLC data were obtained with a Merck-Hitachi LaChrom 7000 instrument coupled with a Diode Array Detector L-7450 and Fluorescence Detector L-7480 (Tokyo, Japan) using 254 nm for monitored wavelengths. The software HSM D-7000 LaChrom<sup>®</sup> was used for data interpretation.

The phase contrast and red fluorescence images of zebrafish bioassays were obtained with a Leica DM6000B microscope.

## Appendix B: Isolation and structural elucidation of OH-Phylloquinone

### 1.1. Cyanobacterial Growth, Extraction and Fractionation

Initial screening assays led to the selection of the cyanobacterial strain, *Tychonema* sp. LEGE 07196 isolated from a Portuguese wastewater treatment plant (Ramos *et al.*, 2018) and maintained in the LEGEcC in CIIMAR, Matosinhos, Portugal. Strains were cultured in Z8 medium, at 25 °C, with a photoperiod of 14 h/10 h light and dark, respectively, and at a light intensity of 10–30  $\mu\text{mol photons}\cdot\text{m}^{-2}\cdot\text{s}^{-1}$ . *Tychonema* sp. LEGE 07196 cultures were grown in 80 l sleeve bag with constant aeration and, at the exponential phase, cells were harvested through centrifugation, before being frozen and freeze-dried. Two rounds of biomass extraction were necessary. A (i) mixture of  $\text{CH}_2\text{Cl}_2/\text{MeOH}$  was firstly used and (ii) then based on previous work the biomass (70 g) was extracted by repeated percolation with MeOH, yielding a crude extract of 11.1 g. The crude extract was fractionated by normal-phase (Si gel 60, 0.015–0.040 mm, Merck KGaA, Darmstadt, Germany) VLC (vacuum liquid chromatography) with an increasing polarity grade, from 100% *n*-Hex to 100% EtOAc and 100% MeOH (Leao *et al.*, 2013), giving a total of nine fractions.

### 1.2. Compound Isolation and Structure Elucidation

The first approach to isolate the compound was based on zebrafish bioassay-guided fractionation. In the re-isolation, the VLC fractions were subjected to an HRMS/MS analysis, with a chromatographic column Luna-C18 (250mm 4.6 mm, 5  $\mu\text{m}$ , 100 Å, Phenomenex). Samples were eluted at 0.8 mL/min with a linear gradient starting from 1:1 ACN/ $\text{H}_2\text{O}$  (acetonitrile/water) to 100% ACN in 20 min. Fraction B (9:1 *n*-Hex/EtOAc, *v/v*; ethyl acetate/hexane) showed the monoisotopic mass value 467.3531 *m/z* that appeared to be the major compound with the fragment value 449.3387 *m/z*. Thus, was further sub-fractionated by flash column chromatography using Si gel 60 (0.015–0.040 mm, Merck KGaA, Darmstadt, Germany) as a stationary phase and a gradient of increasing polarity from 1:0 *n*-Hex/ EtOAc to 0:1 EtOAc/ MeOH (*v/v*) (methanol) producing 11 fractions. The sub-fractions B5 and B6, eluted in 9:1 to 4:1 *n*-Hex/ EtOAc (*v/v*), had the previous mass values, so they were pooled. Then, a SPE (solid-phase extraction) separation was performed, using a prepacked normal-phase  $\text{SiO}_2$  5g cartridges (Strata SI-1 55  $\mu\text{m}$ , 70 Å, Phenomenex) and a gradient of 1:0 *n*-Hex/ EtOAc to 0:1 EtOAc/ MeOH (*v/v*), yielding 9 fractions. Sub-fractions B5+6C and B5+6D eluted in 19:3 *n*-Hex/ EtOAc (*v/v*) possessed the compound of interest and, thus, were submitted to HPLC using a Luna 5  $\mu\text{m}$  Si (250 x 4.6 mm 100 Å, Phenomenex, Torrance, California, USA) column and using a linear gradient from 19:3 to 9:1 *n*-Hex/ EtOAc (*v/v*) for 5 min. and being maintained at 9:1 *n*-Hex/ EtOAc (*v/v*) for another 22 min. Then there was an increase of the polarity with a linear gradient from 9:1 to 0:1 *n*-Hex/ EtOAc in 1 min. and being maintained at 0:1 *n*-Hex/ EtOAc for another 5 min (1 mL/min. flow). Subfraction B5+6C+D2 needed to be further purified by another round of HPLC with an isocratic mixture of 19:3 *n*-Hex/ EtOAc (*v/v*) for 45 min. (1 mL/min. flow). 5<sup>11</sup>-OH-Phylloquinone was isolated as the major component at 27 min RT (retention time).

The <sup>1</sup>H NMR and <sup>13</sup>C NMR spectra of the compound (Table S2 and Figure S2 and S3) exhibited all the resonances of the 1,4-naphthoquinone system and the attached phytyl side-chain. All carbons and protons, as well as the functional groups, were assigned to the proposed structure based on 2D NMR spectral data (HMBC and COSY, Figures S5 and S6), as shown in Figure S1. The assignment was corroborated by the reported data for similar moieties (<sup>1</sup>H NMR,  $\text{CDCl}_3$ ; <sup>1,2</sup>). Additionally, in agreement with Allen *et al.* and Law *et al.* the performance of Fourier Transform Infrared Spectroscopy (FT-IR) and UV-visible (UV-vis) absorption experiments indicated the presence of the hydroxy group in its intermolecular bonded nature at C-5', the double bond at C2'-C3' and the alkane nature of the side-chain, as well as the quinone conjugated system, including the ketones functional groups, depicted by maximum absorption peaks and its shoulders (UV-vis), further confirmed the proposed compound (Figure S8 and S9).<sup>3,4</sup>

The ROESY spectrum revealed signals of the Overhauser enhancement between OH-5<sup>11</sup> at  $\delta$  4.16 ppm and methylene H<sub>2</sub>-1' at  $\delta$  3.32 ppm, and between the latter and H-2' at  $\delta$  4.99 ppm. Additionally, signals were observed between the methyl H<sub>3</sub>-7<sup>11</sup> at  $\delta$  0.74 ppm and terminal methyl 15<sup>11</sup> and 16<sup>11</sup> at  $\delta$  0.83 ppm and a very weak one with H-5' at  $\delta$  3.59 ppm, in which the latter had with methyl H<sub>3</sub>-3<sup>11</sup> at  $\delta$  1.74 ppm and with methylene H<sub>2</sub>-4' at  $\delta$  1.93/2.06 ppm (Figure S7). These correlations suggest that the hydroxy group protons are on the same side of the molecule plane as the carbons at C-1' and C-2' positions and on the opposite position of the protons at H<sub>3</sub>-7<sup>11</sup>.

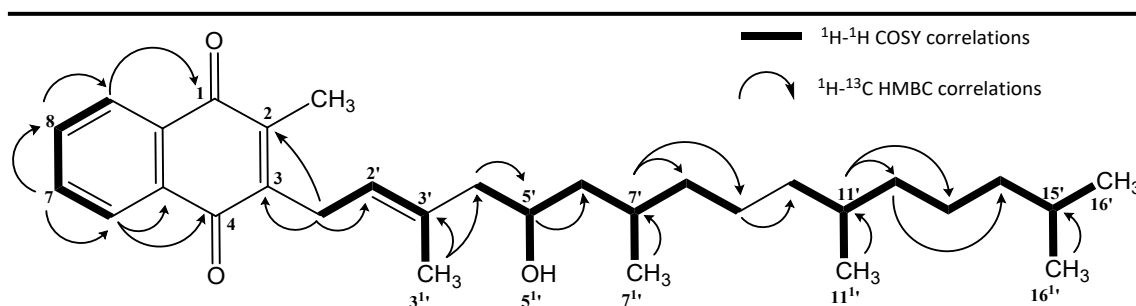

Figure S1 Key <sup>13</sup>C-<sup>1</sup>H HMBC and <sup>1</sup>H-<sup>1</sup>H COSY correlations for 5<sup>11</sup>-OH-Phylloquinone.

The OH-PhQ stereochemistry was confirmed by ROESY experiments. Initial experiments performed on isolated natural K1 enlighten the natural 2', 3' -*trans*-(7'*R*, 11'*R*) configurations of the side-chain, along with the natural phytol configuration.<sup>5</sup> Later, Kosugi *et al.* synthesized a mixture of 16 possible stereoisomers of OH-PhQ, confirming the 5'*S*-OH configuration of the natural compound isolated from *Synechococcus* sp. PCC 7942.<sup>6</sup> To further confirm the obtained results and fully uncover the configuration of the isolated natural compound, ECD experiments were performed adjusting the parameters according with the literature data. The simulated spectra were obtained with the weighted (Boltzmann factor) average of the three most stable conformers (data not shown), however the ECD spectrum did not show clear results. Consequently, the 5'*S* stereochemistry configuration was assigned through comparison of ROESY and literature data.

**Table S 1** <sup>1</sup>H and <sup>13</sup>C NMR data (δ, ppm) of 5'-OH-Phylloquinone at 600 MHz in DMSO-d<sub>6</sub> (deuterated dimethyl sulfoxide).

| Position              | δ <sub>H</sub> (J in Hz)                   | δ <sub>C</sub> | Position                   | δ <sub>H</sub> (J in Hz) | δ <sub>C</sub> |
|-----------------------|--------------------------------------------|----------------|----------------------------|--------------------------|----------------|
| <b>1</b>              |                                            | 184.69         | <b>5'</b>                  | 3.59 ddd (9.2, 6.0, 3.0) | 65.84          |
| <b>2</b>              |                                            | 142.89         | <b>5'<sup>1</sup> - OH</b> | 4.16 d (5.7)             |                |
| <b>2<sup>1</sup></b>  | 2.11 s                                     | 12.42          | <b>6'</b>                  | 1.17 m<br>0.94 m         | 43.88          |
| <b>3</b>              |                                            | 145.29         | <b>7'</b>                  | 1.56 m                   | 28.26          |
| <b>4</b>              |                                            | 183.85         | <b>7'<sup>1</sup></b>      | 0.74 d (6.6)             | 19.17          |
| <b>5</b>              |                                            | 131.56 *       | <b>8'</b>                  | 0.98 dd (5.1, 1.9)       | 37.74          |
| <b>6</b>              | 7.99 ddd (5.9, 3.1, 1.9)                   | 125.89 *       | <b>9'</b>                  | 1.10 d (1.7)             | 23.57          |
| <b>7</b>              | 7.83 dd (5.7, 3.3)                         | 133.85         | <b>10'</b>                 | 1.18 m                   | 36.57          |
| <b>8</b>              | 7.83 dd (5.7, 3.3)                         | 133.85         | <b>11'</b>                 | 1.28 dt (12.2, 5.7)      | 31.96          |
| <b>9</b>              | 7.99 ddd (5.9, 3.1, 1.9)                   | 125.81 *       | <b>11'<sup>1</sup></b>     | 0.77 d (6.6)             | 19.58          |
| <b>10</b>             |                                            | 131.55 *       | <b>12'</b>                 | 1.01 m                   | 36.66          |
| <b>1'</b>             | 3.32 d (6.2)                               | 25.49          | <b>13'</b>                 | 1.20 d (3.1)             | 24.10          |
| <b>2'</b>             | 4.99 t (6.7)                               | 121.08         | <b>14'</b>                 | 1.09 dd (6.1, 3.1)       | 38.75          |
| <b>3'</b>             |                                            | 134.77         | <b>15'</b>                 | 1.48 dt (13.3, 6.6)      | 27.35          |
| <b>3'<sup>1</sup></b> | 1.74 s                                     | 16.64          | <b>15'<sup>1</sup></b>     | 0.83 d (6.6)             | 22.56 *        |
| <b>4'</b>             | 2.06 dd (13.1, 6.5)<br>1.93 dd (13.2, 6.4) | 48.64          | <b>16'</b>                 | 0.83 d (6.6)             | 22.56 *        |

\* - Assignment undetermined due to similarities of chemical surroundings/environment.

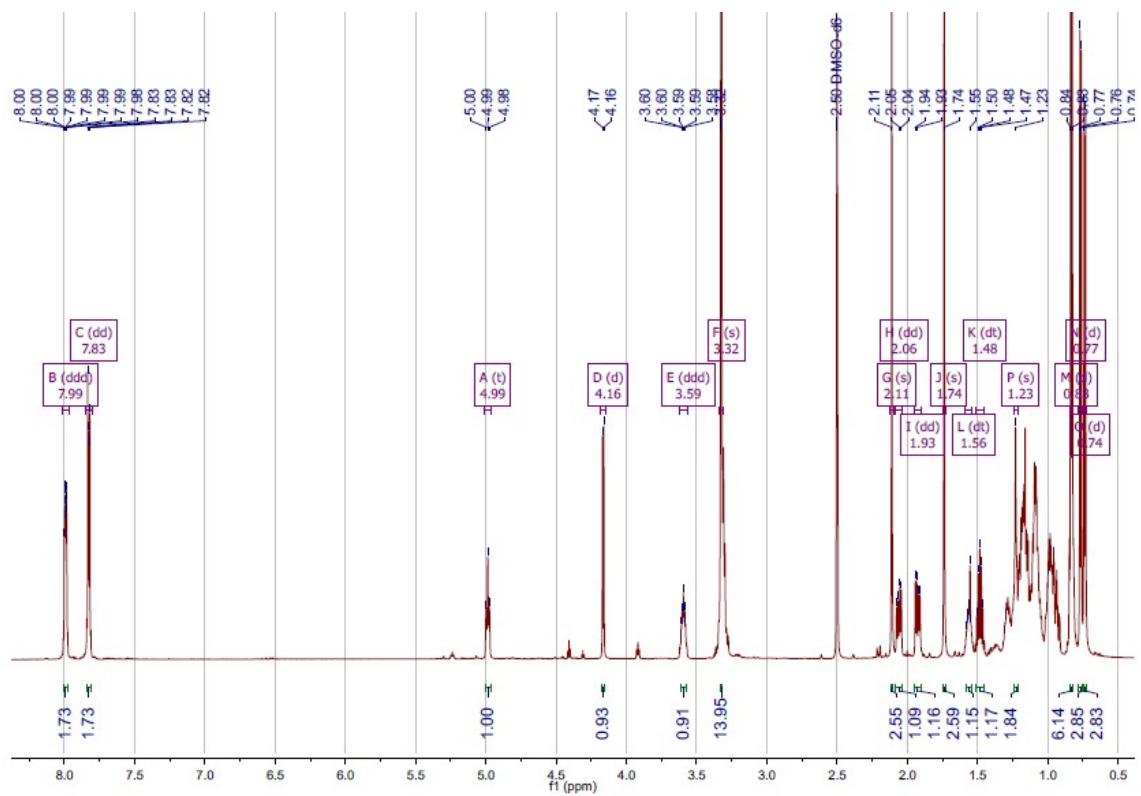

**Figure S 2**  $^1\text{H}$  NMR spectrum of 5'1'-OH-Phylloquinone in DMSO- $d_6$  (600 MHz).

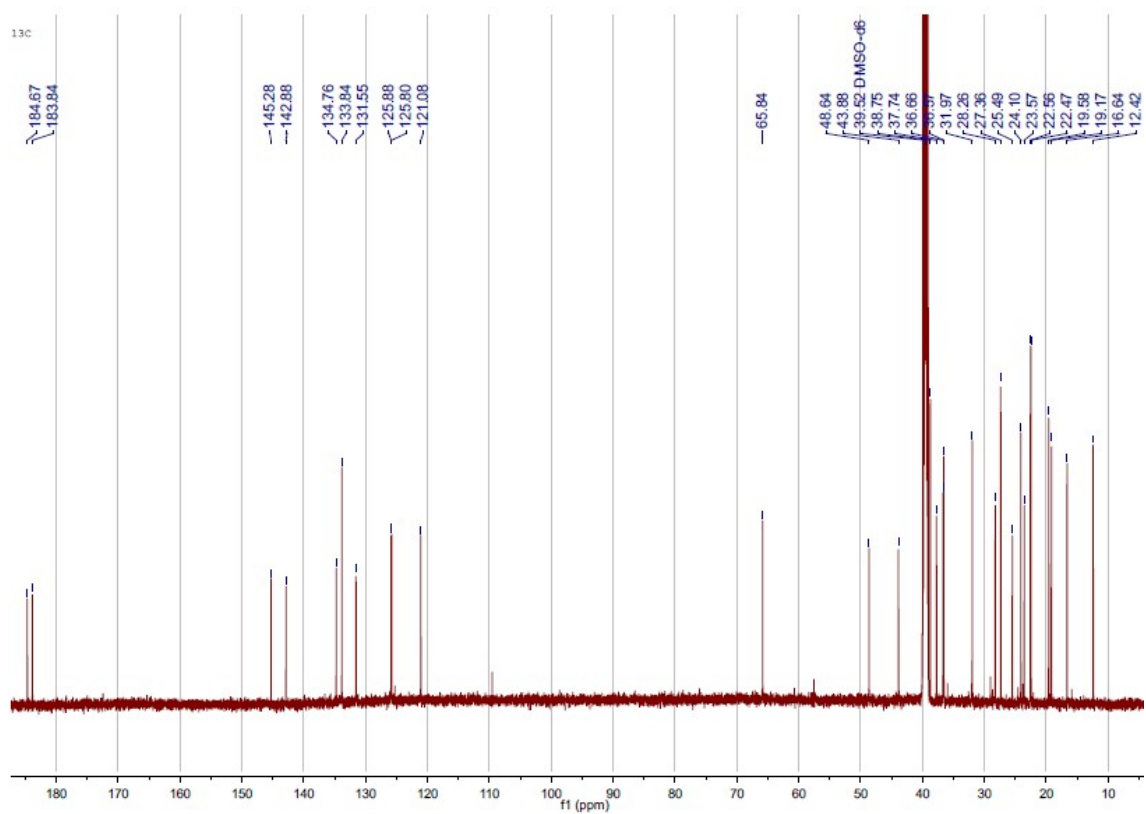

**Figure S 3**  $^{13}\text{C}$  NMR spectrum of 5'1'-OH-Phylloquinone in DMSO- $d_6$  (600 MHz).

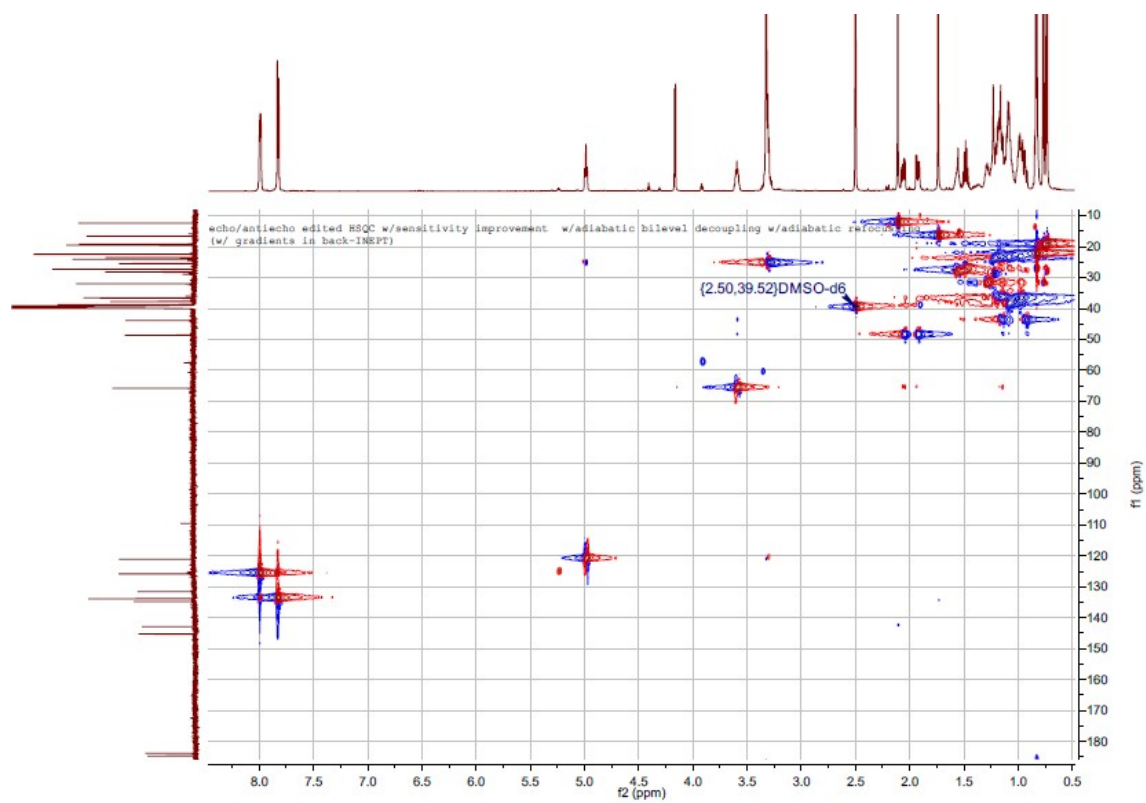

Figure S 4 HSQC spectrum of 5<sup>11</sup>-OH-Phylloquinone in DMSO-*d*<sub>6</sub> (600 MHz).

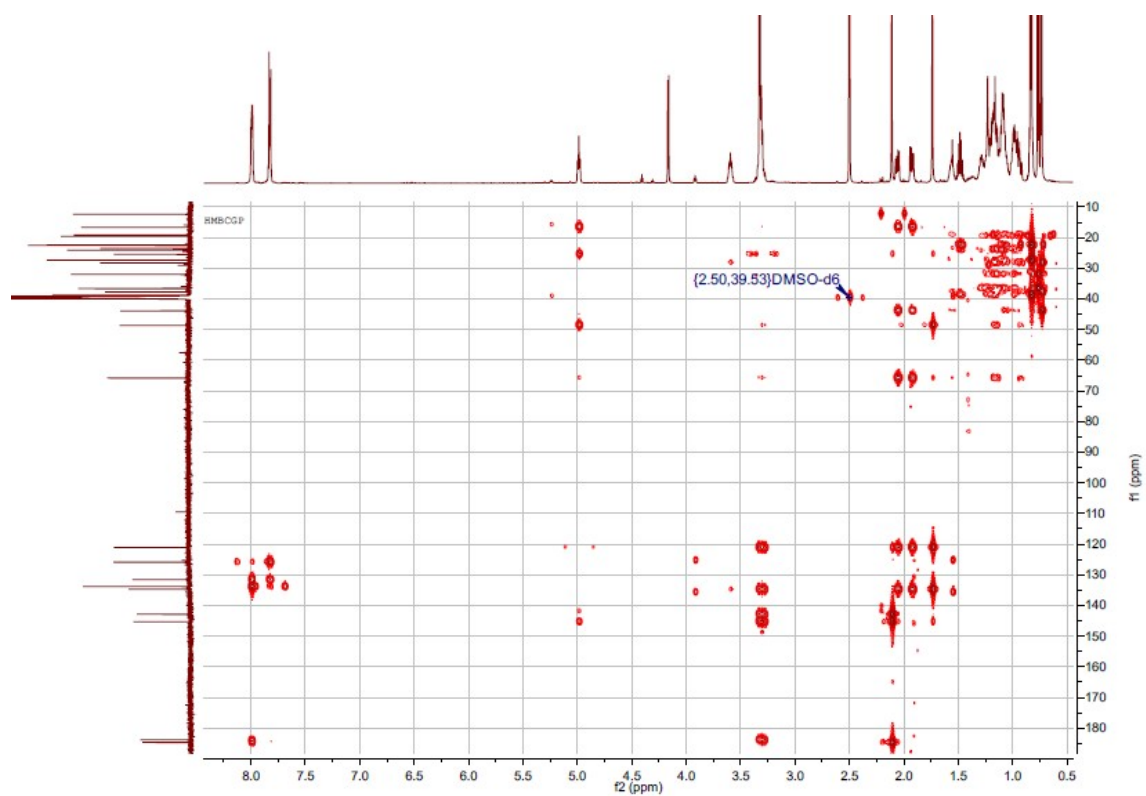

Figure S 5 HMBC spectrum of 5<sup>11</sup>-OH-Phylloquinone in DMSO-*d*<sub>6</sub> (600 MHz).

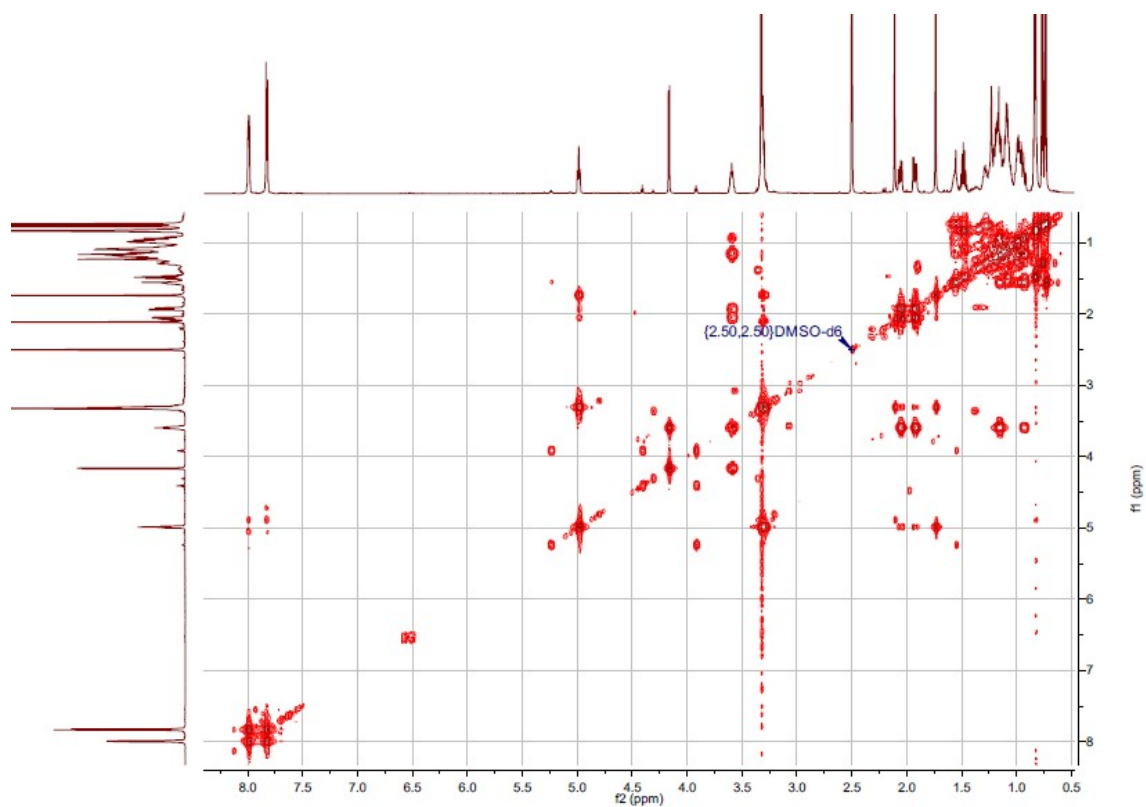

**Figure S 6**  $^1\text{H}$ - $^1\text{H}$  COSY spectrum of  $5^{1'}\text{-OH-Phylloquinone}$  in  $\text{DMSO-}d_6$  (600 MHz).

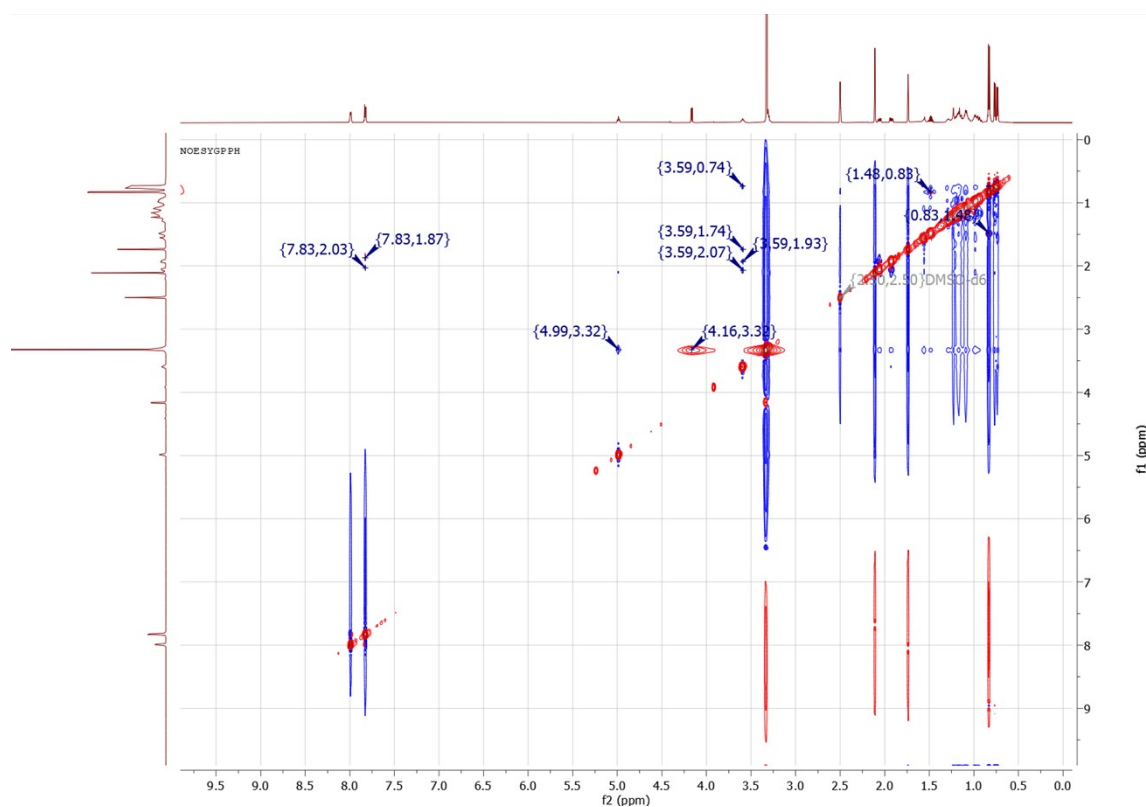

**Figure S 7** ROESY spectrum of  $5^{1'}\text{-OH-Phylloquinone}$  in  $\text{DMSO-}d_6$  (600 MHz).

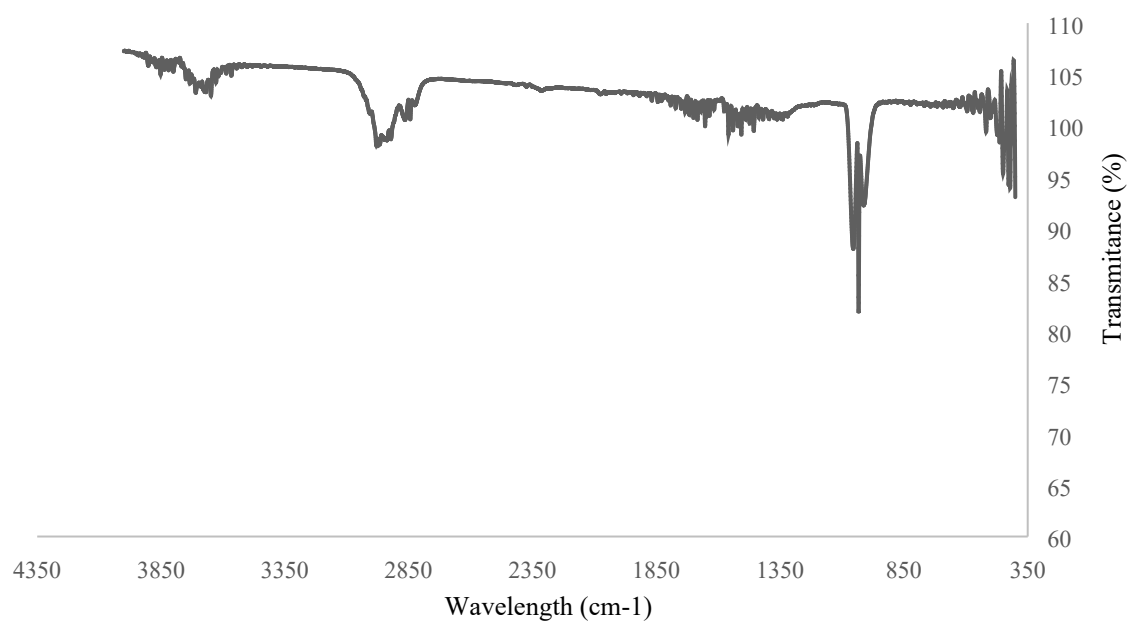

**Figure S 8** Fourier Transform Infrared Spectroscopy (FT-IR) spectrum of 5'-OH-Phylloquinone (using potassium bromide IR sample card).

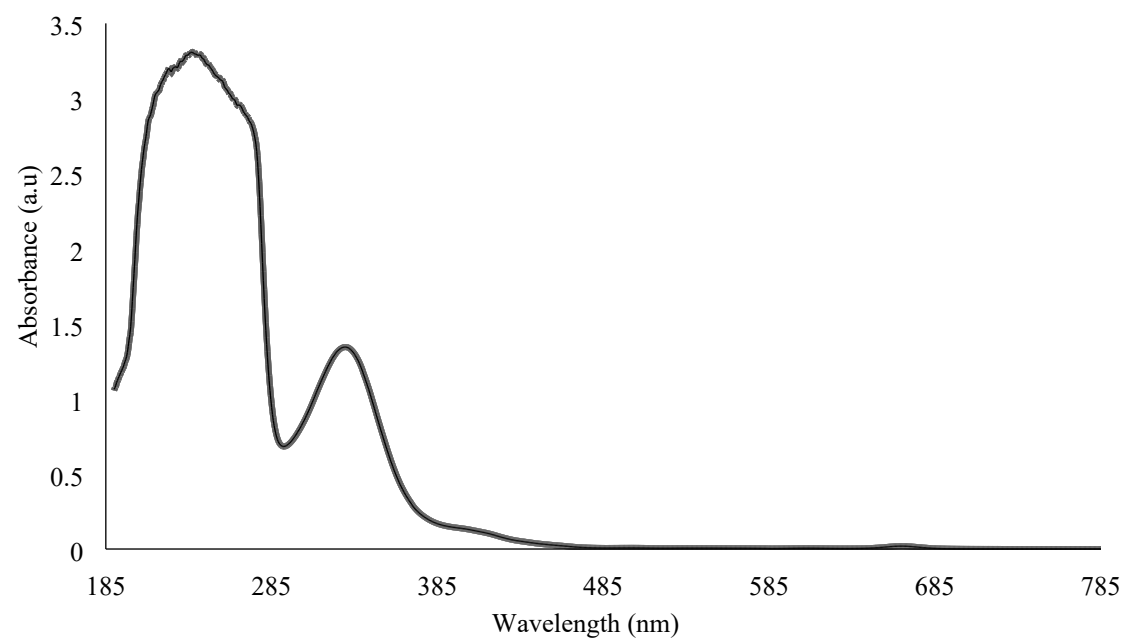

**Figure S 9** UV-visible absorption spectrum of 5'-OH-Phylloquinone in MeOH.

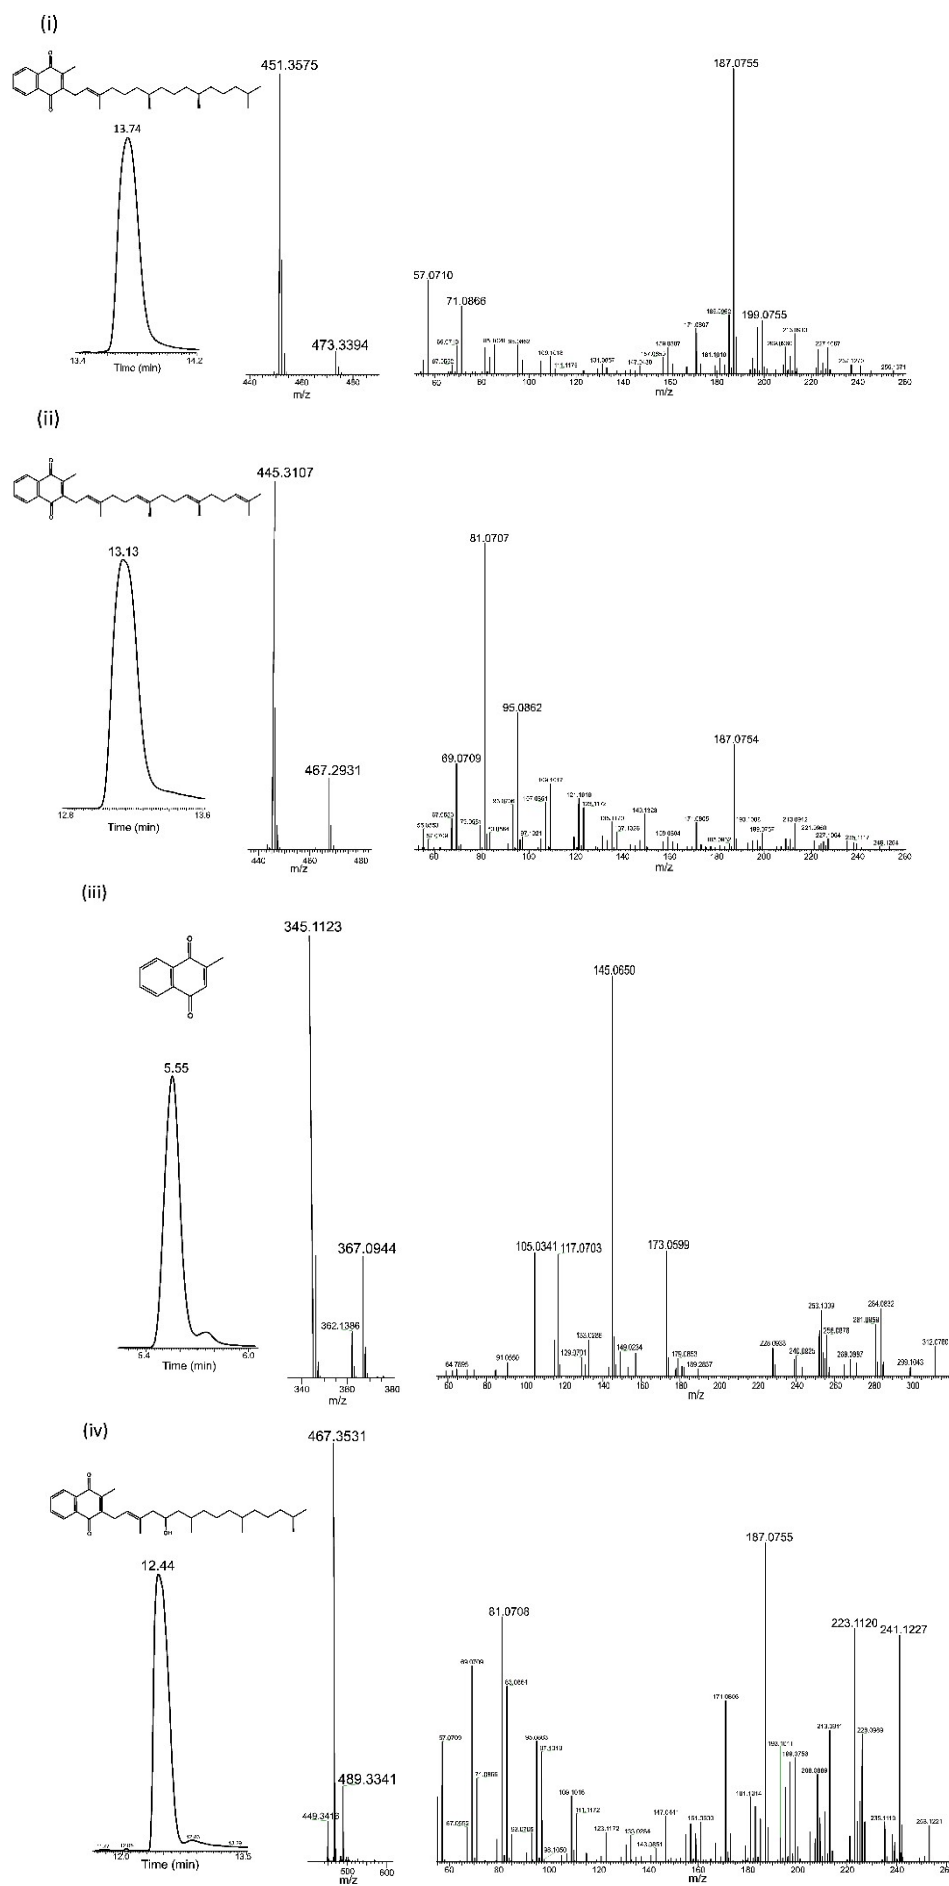

**Figure S 10** LC-ESI-HRMS/MS spectra of vitamin K isoforms in the positive ion mode, showing the retention time (RT) and major detected adducts from MS1 data and fragmentation from MS2 data. (i) Phylloquinone, (ii) Menaquinone (MK-4), (iii) Menadione and (iv) OH-PhQ.

1. R. Schmida, S. Antoulas, A. Rüttimann, M. Schmid, M. Vecchi and H. Weiserb, Synthesis of all four stereoisomers of (E)-vitamin K<sub>1</sub> (phyloquinone), analysis of their diastereoisomeric and enantiomeric purities and determination of their biopotencies, *Helvetica chimica acta*, 1990, **73**, 1276-1299.
2. M. Vecchi, M. Schmid, W. Walther and F. Gerber, Determination of the diastereomers of Vitamin K<sub>1</sub>, *Journal of High Resolution Chromatography*, 1981, **4**, 257-259.
3. C. Allen, H. Franke and O. Hirayama, Identification of a plastoquinone and two naphthoquinones in *Anacystis nidulans* by NMR and mass spectroscopy, *Biochemical and Biophysical Research Communications*, 1967, **26**, 562-568.
4. A. Law, G. Thomas and D. R. Threlfall, 5'-Monohydroxyphyloquinone from *Anacystis* and *Euglena*, *Phytochemistry*, 1973, **12**, 1999-2004.
5. L. Jackman, R. Rüegg, G. Ryser, C. von Planta, U. Gloor, H. Mayer, P. Schudel, M. Kofler and O. Isler, On the chemistry of vitamin K. 2. Total synthesis and stereochemistry of trans-and cis-(7'R, 11'R)-phyloquinone and related compounds, *Helvetica Chimica Acta*, 1965, **48**, 1332-1349.
6. M. Kosugi, C. Lee, T. Misaki, Y. Kashino, M. Fujita and T. Sugimura, Stereochemical assignment of the unique electron acceptor 5'-hydroxyphyloquinone, a polar analog of vitamin K<sub>1</sub> in photosystem I, *Bioscience, Biotechnology, and Biochemistry*, 2017, **81**, 2244-2252.

## Appendix C. Biological effects of exposed zebrafish larvae to vitamin K isoforms

### 1.1. Zebrafish maintenance

Fish were maintained as described in the zebrafish book available at the ZFIN database (<https://zfin.org/>). Wild-type fish of the AB strain were used and cultured in 30 L aquaria at 28 °C. Adult fish in each tank was fed with dry fish food 2 times per day and occasionally artemia. Embryos spawned under a 14 h on/10 h off light cycle and were collected and cultured in petri dishes containing Egg water (60 µg/mL marine sea salt dissolved in distilled water) at 28 °C.

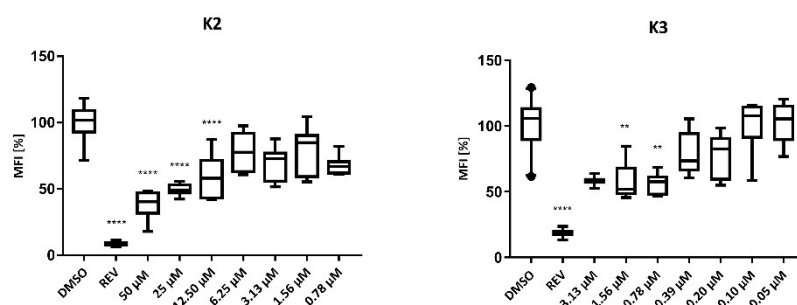

**Figure S 11** EC50 values determination in the zebrafish Nile red fat metabolism assay. Seven concentrations of each compound were exposed for 48 h, together with solvent control DMSO (dimethyl sulfoxide 0.1%) and positive control REV (resveratrol 50 µM). Values are expressed as percentage of mean fluorescence intensity (MFI) relative to the DMSO group and are derived from six to eight individual larvae per treatment group. The data are represented as box-whisker plots from the 5th to 95th percentiles. Asterisks highlight significant altered fluorescence intensities that indicate changes of neutral lipid level (\*\*\*\*  $p < 0.0001$ ; \*\*\*  $p < 0.001$ ; \*\*  $p < 0.01$ ; \*  $p < 0.05$ ).

**Table S 2** Parameters used in MZmine 2 for mass feature detection, chromatogram building, feature alignment and filtering for further MetaboAnalyst analyses.

| MZmine 2 Workflow                      | Parameters used                                     |                                   |
|----------------------------------------|-----------------------------------------------------|-----------------------------------|
| 1. Project                             | Sampler Parameters                                  | DMSO/Hex-EtOH – Solvent control   |
|                                        |                                                     | K1/K2/K3/K1-analogue - Treatments |
| 2. Mass detection (centroid)           | Noise level for MS1                                 | 1E4                               |
|                                        | Noise level for MS2                                 | 1E3                               |
| 3. ADAP chromatogram builder           | Minimum group size in # of scans                    | 2                                 |
|                                        | Group intensity threshold                           | 1E4                               |
|                                        | Minimum highest intensity                           | 1E4                               |
|                                        | <i>m/z</i> tolerance                                | 10.0 ppm                          |
|                                        | <i>m/z</i> tolerance                                | 10.0 ppm                          |
| 4. Alignment (Join aligner RANSAC)     | Retention time (RT) tolerance                       | 0.3 min                           |
|                                        | RT tolerance after correction                       | 0.5 min                           |
|                                        | RANSAC iteration                                    | 0                                 |
|                                        | Minimum n° points                                   | 80                                |
|                                        | Threshold                                           | 0.3                               |
| 5. Filtering (Feature list row filter) | Charge state                                        | Same                              |
|                                        | Keep only peaks with MS2 scan and Reset peak number |                                   |
| 6. Filtering (Duplicate peak filter)   | MetaboAnalyst                                       | Old Average                       |
|                                        | <i>m/z</i> tolerance                                | 10.0 ppm                          |
|                                        | RT                                                  | 0.1 min                           |

## Targeted Extraction

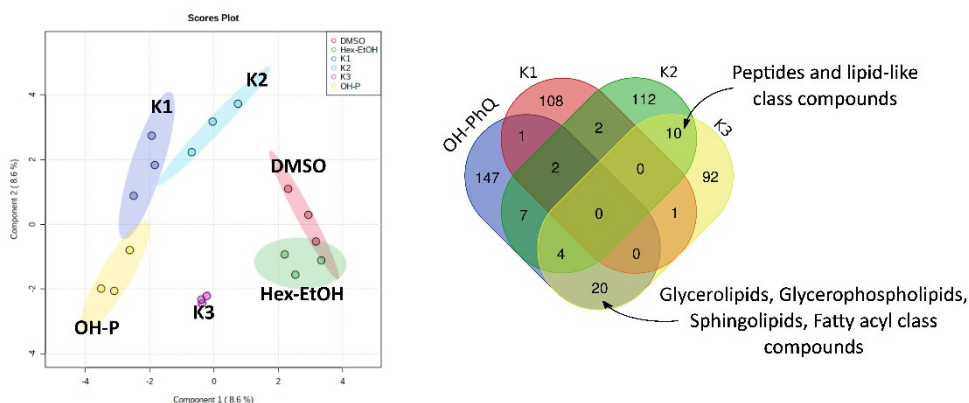

**Figure S 12** Statistically significant metabolites from exposed zebrafish larvae to the vitamins K family in comparison with control samples from targeted extraction. Data is presented as Partial Least Squares-Discriminant Analysis (PLS-DA) plot and Venn's diagram with a statistical significance of 0.05 (ANOVA - T-test using Tukey's/Fisher's post hoc test).

**Table S 3** Concentrations range (0.03  $\mu$ M, 0.25  $\mu$ M, 2.5  $\mu$ M, 25  $\mu$ M, 250  $\mu$ M, 2.5 mM), major adducts, 4 main fragments (relative abundance in which major is in bold), ionization intensities range and RT (retention time) of the different standard compounds detected by ESI source (positive ion mode).

| COMPOUND | CONCENTRATION RANGE   | ADDUCT  | m/z      | FRAGMENTS [RELATIVE ABUNDANCE] (m/z)                                        | IONIZATION INTENSITY RANGE | RT (min) |
|----------|-----------------------|---------|----------|-----------------------------------------------------------------------------|----------------------------|----------|
| K1       | 0.03 $\mu$ M – 2.5 mM | M + H   | 451.3575 | 199.0755 [18],<br><b>187.0755 [100]</b> ,<br>71.0865 [22],<br>57.0710 [31]  | 8,66E+05 –<br>4,43E+09     | 13.74    |
|          |                       | M + Na  | 473.3394 |                                                                             |                            |          |
| K2       | 0.03 $\mu$ M – 2.5 mM | M + H   | 445.3107 | 187.0754 [35],<br>95.0862 [45],<br><b>81.0707 [100]</b> ,<br>69.0709 [28]   | 4,01E+06 –<br>5,31E+09     | 13.13    |
|          |                       | M + Na  | 467.2931 |                                                                             |                            |          |
| K3       | 0.03 $\mu$ M – 2.5 mM | M + H   | 173.0596 | –                                                                           | 5,13E+04 –<br>2,75E+06     | 5.55     |
|          |                       | 2M + H  | 345.1123 | 173.0599 [28]<br><b>145.0650 [100]</b> ,<br>117.0703 [30],<br>105.0341 [27] | 3,44E+04 –<br>4,08E+08     |          |
|          |                       | 2M + Na | 367.0944 |                                                                             |                            |          |
| OH-PhQ   | 0.03 $\mu$ M – 2.5 mM | M + H   | 467.3531 | 241.1228 [68],<br>223.1118 [75],<br><b>187.0755 [100]</b> ,<br>81.0708 [71] | 3,23E+06 –<br>1,21E+09     | 12.44    |
|          |                       | M + Na  | 489.3341 |                                                                             |                            |          |
|          |                       | 2M + H  | 933.6982 |                                                                             |                            |          |

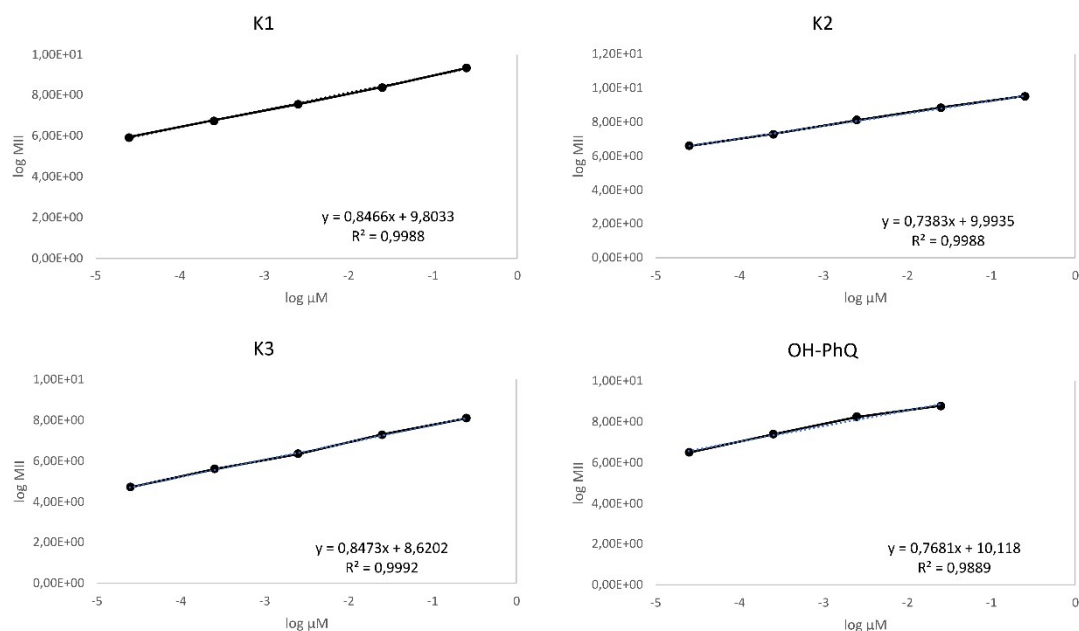

**Figure S 13** Standard calibration curves of the vitamins K family (OH-PhQ, K1, K2 and K3) analyzed by LC-ESI-HRMS/MS in the positive ion mode using the same methodology as described under “Material and Methods: General Experimental Procedures”. The results are presented as logarithmic concentrations ( $\mu\text{M}$ ) and logarithmic mean intensity ionizations (MI) of the 4 isoforms.

## Targeted Extraction

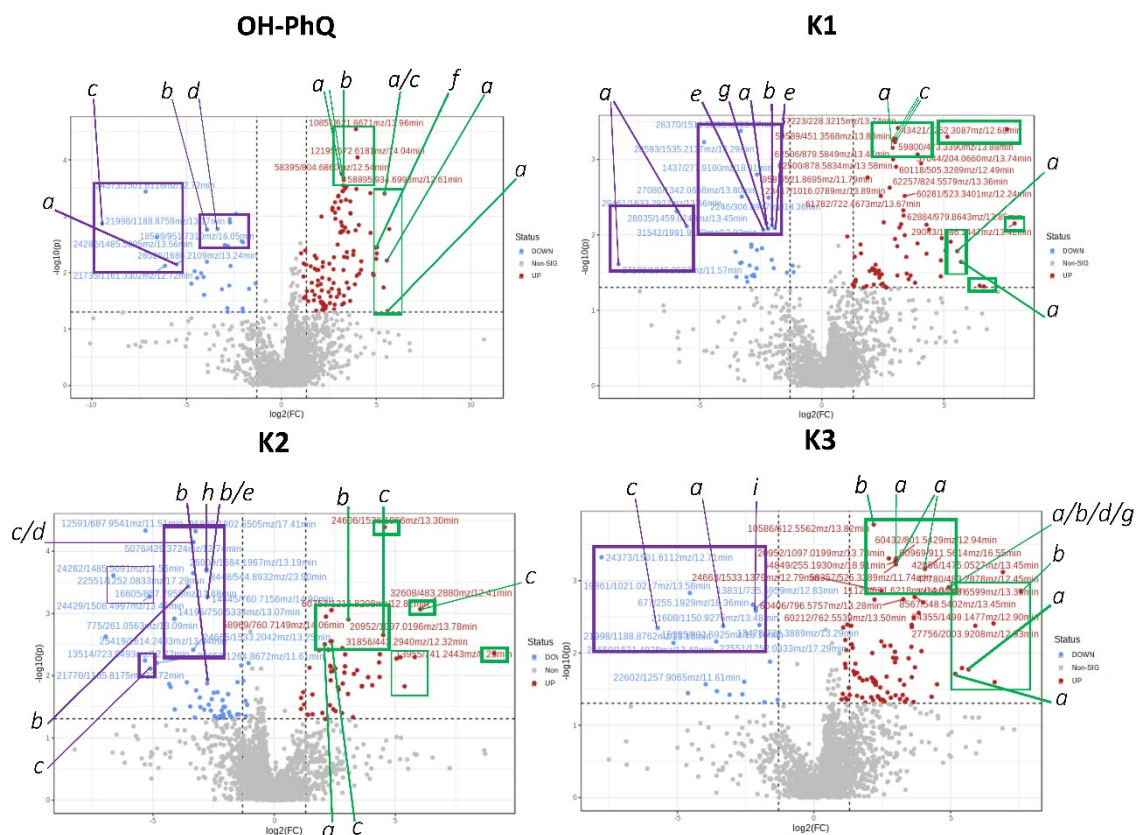

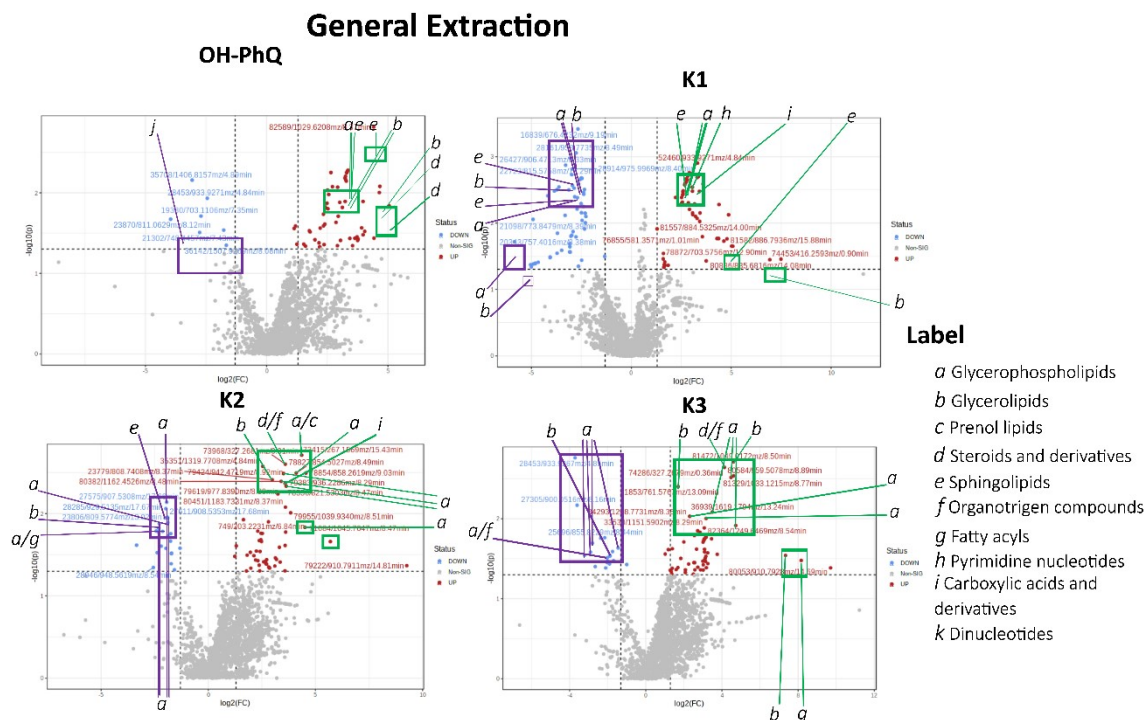

**Figure S 14** Statistically significant and enriched metabolites from zebrafish larvae exposed to different vitamins K family, in comparison with control samples, from both extraction procedures. Data presented as volcano plot with a statistical significance of 0.05 (ANOVA - T-test using Tukey's/Fisher's post hoc test) and a threshold of 4-fold difference ( $2 \log_2 FC$ ) 2.0. In each representation is shown the class of the identified top 20 statistically significant and enriched ( $2 \log_2 FC \geq 5$ ) compounds. Boxes green and purple represent the top selected metabolites, up/down, respectively.

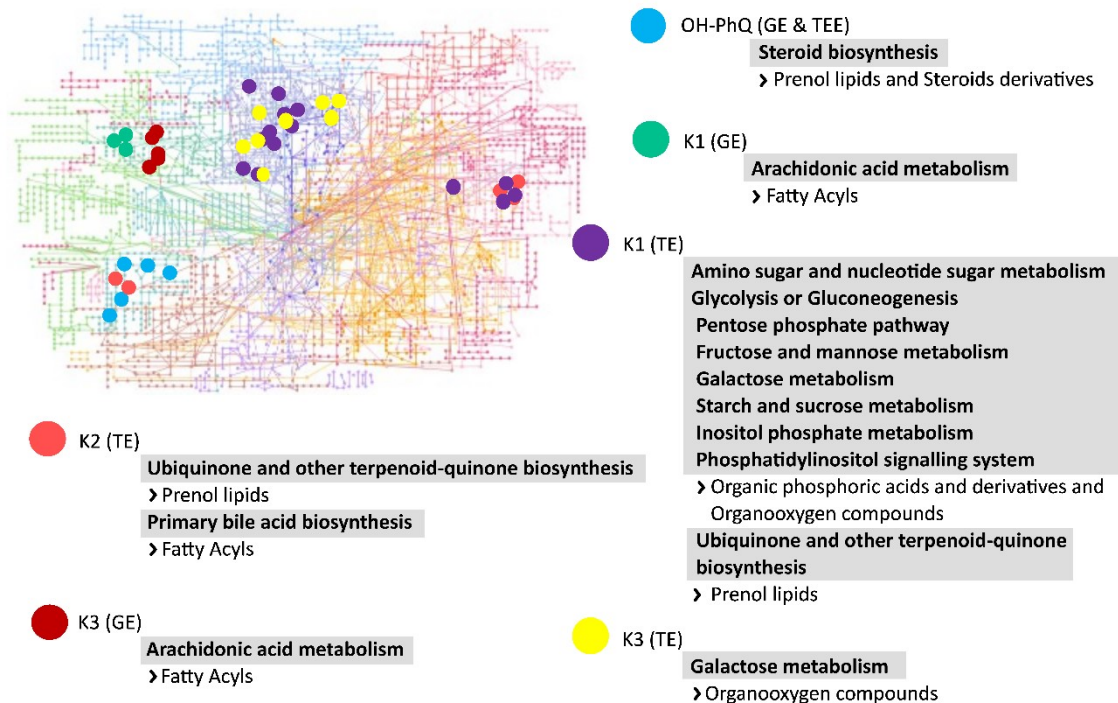

**Figure S 15.** Statistically significant metabolic pathways resulting from the supplementation of vitamins K family: OH-PhQ, K1, K2 and K3. The two extraction procedures, general (GE) and targeted extraction (TE), were analyzed and compared. In bold and grey shade are listed the pathways whereas below are the class of compounds involved in such pathways. All indicated pathways are up-regulated.

**Table S 4** Identification of statistically significant and enriched metabolites from exposed zebrafish larvae to OH-PhQ vitamin, in comparison with control samples, from general extraction. Is shown the putative identification ( $\Delta$  ppm < 5) chemical taxonomy (class and subclass) of the top 20 statistically significant and enriched compounds ( $p$ -value  $\leq$  0.05, with inclusion of all  $\log_2FC \geq 5$ ).

| <i>m/z</i> | Log2FC | <i>p-value</i> | OH-PHQ TREATMENT                                                                                                                                              |                                      |                          |
|------------|--------|----------------|---------------------------------------------------------------------------------------------------------------------------------------------------------------|--------------------------------------|--------------------------|
|            |        |                | Putative identification ( <i>m/z</i> , $\Delta$ ppm, adduct)                                                                                                  | Chemical Taxonomy<br>Sub-Class       | Class                    |
| 1420.1639  | 3.25   | 0.0062         | <b>Several DG</b> , ex: DG(20:3n6/0:0/22:2n6) (698.5849, 3, [2M+Na] <sup>+</sup> )                                                                            | Diacylglycerols                      | Glycerolipids            |
| 1208.7729  | 2.65   | 0.0056         | <b>Several CL</b> , ex: CL(11:0/11:0/11:0/18:2(9Z,11Z)) (1166.7375, 1, [M+ACN+H] <sup>+</sup> )                                                               | Glycerophosphoglycerols              | Glycerophospholipids     |
| 1029.6208  | 4.41   | 0.0015         | <b>NeuAcalpha2-3Galbeta-Cer(d18:1/16:0)</b> (990.6603, 2, [M+K] <sup>+</sup> )                                                                                | Gangliosides                         | Sphingolipids            |
| 989.8166   | 3.26   | 0.0069         |                                                                                                                                                               |                                      |                          |
| 977.7994   | 4.67   | 0.0083         | <b>TG(22:4(7Z,10Z,13Z,16Z)/18:2(9Z,12Z)/22:5(7Z,10Z,13Z,16Z,19Z))</b> (994.7989, 3, [M+H-H <sub>2</sub> O] <sup>+</sup> )                                     | Triacylglycerol                      | Glycerolipids            |
| 925.5435   | 3.30   | 0.0056         | <b>Several PI</b> , ex: PI(18:1(9Z)-O(12,13)/22:5(7Z,10Z,13Z,16Z,19Z)) (924.5364, 0, [M+H] <sup>+</sup> )                                                     | Glycerophosphoinositols              | Glycerophospholipid      |
| 894.7038   | 4.64   | 0.0099         | <b>27-Nor-5b-cholestane-3a,7a,12a,24,25-pentol</b> (438.3345, 1, [2M+NH <sub>4</sub> ] <sup>+</sup> )                                                         | Bile acids, alcohols and derivatives | Steroids and derivatives |
| 880.7019   | 5.05   | 0.0145         | <b>Sitosterol 3-O-(6'-O-linoleyl-beta-D-glucoside) or Isofucosterol 3-O-[6-O-(9-Octadecenoyl)-b-D-glucopyranoside]</b> (838.6687, 1, [M+ACN+H] <sup>+</sup> ) | Stigmastanes and derivatives         | Steroids and derivatives |
| 824.5338   | 3.30   | 0.0056         | <b>Several SM</b> , ex: SM(d16:2(4E,8Z)/22:5(4Z,7Z,10Z,13Z,19Z)-O(16,17)) (760.5155, 3, [M+ACN+Na] <sup>+</sup> )                                             | Phosphosphingolipids                 | Sphingolipids            |
| 371.2577   | 3.28   | 0.0072         | <b>Several DG</b> , ex: DG(LTE4/0:0/i-14:0) (723.4744, 0, [M+H+NH <sub>4</sub> ] <sup>+</sup> )                                                               | Diacylglycerols                      | Glycerolipids            |
| 1006.5269  | -1.77  | 0.0291         | <b>Several PIP</b> , ex: PIP(5-iso PGF2VI/18:0) (988.4926, 1, [M+NH <sub>4</sub> ] <sup>+</sup> )                                                             | Glycerophosphoinositol phosphates    | Glycerophospholipid      |
| 811.0629   | -3.96  | 0.0213         | <b>Diguanosine triphosphate</b> (788.0718, 2, [M+Na] <sup>+</sup> )                                                                                           | Dinucleotides                        | Dinucleotides            |
| 748.4457   | -2.77  | 0.0311         |                                                                                                                                                               |                                      |                          |
| 703.1106   | -2.71  | 0.0195         |                                                                                                                                                               |                                      |                          |

**Table S 5** Identification of statistically significant and enriched metabolites from exposed zebrafish larvae to K1 vitamin, in comparison with control samples, from general extraction. Is shown the putative identification ( $\Delta$  ppm < 5) chemical taxonomy (class and subclass) of the top 20 statistically significant and enriched compounds (p-value  $\leq$  0.05, with inclusion of all  $\log_2FC \geq 5$ ).

| <i>m/z</i> | Log2FC | <i>p-value</i> | K1 TREATMENT                                                                                                                                                                                                                                                                                                                         |                                                   |                                  |
|------------|--------|----------------|--------------------------------------------------------------------------------------------------------------------------------------------------------------------------------------------------------------------------------------------------------------------------------------------------------------------------------------|---------------------------------------------------|----------------------------------|
|            |        |                | Putative identification ( <i>m/z</i> , $\Delta$ ppm, adduct)                                                                                                                                                                                                                                                                         | Chemical Taxonomy                                 |                                  |
|            |        |                |                                                                                                                                                                                                                                                                                                                                      | Sub-Class                                         | Class                            |
| 1071.4167  | 3.29   | 0.0021         | (11Z,14Z)-Henicos-11,14-dienoyl-CoA or (8Z,11Z)-Henicos-8,11-dienoyl-CoA (1071.3918, 2, [M+NH <sub>4</sub> -H <sub>2</sub> O] <sup>+</sup> )                                                                                                                                                                                         | Peptide                                           | Carboxylic acids and derivatives |
| 994.6264   | 2.83   | 0.0020         | Lithocholyltaurine (483.3018, 0, [2M+2H+3H <sub>2</sub> O] <sup>+</sup> )                                                                                                                                                                                                                                                            | Bile acids, alcohols and derivatives              | Steroids and derivatives         |
| 985.5002   | 2.91   | 0.0017         | PS(LTE4/18:0) (946.5353, 2, [M+K] <sup>+</sup> ) or Several PI, ex: PI(18:1(12Z)-2OH(9,10)/22:6(4Z,7Z,10Z,13Z,16Z,19Z)) (940.5313, 2, [M+2Na-H] <sup>+</sup> )                                                                                                                                                                       | Glycerophosphoserines<br>Glycerophosphoinositols  | Glycerophospholipids             |
| 904.6013   | 2.75   | 0.0024         | PE(18:1(12Z)-2OH(9,10)/24:1(15Z)) or PE(24:1(15Z)/18:1(12Z)-2OH(9,10)) (859.6302, 0, [M+2Na-H] <sup>+</sup> )                                                                                                                                                                                                                        | Glycero-phosphoethanolamines                      | Glycerophospholipids             |
| 896.6975   | 2.76   | 0.0022         | N-[(2S,3S,4R)-3,4-Dihydroxy-1-[3,4,5-trihydroxy-6-(hydroxymethyl)oxan-2-yl]oxyoctadecan-2-yl]hexacosanamide (857.7320, 3, [M+K] <sup>+</sup> )                                                                                                                                                                                       | Glycosphingolipids                                | Sphingolipids                    |
| 835.6816   | 6.93   | 0.0356         | Several TG, ex: TG(15:0/18:3(6Z,9Z,12Z)/18:4(6Z,9Z,12Z,15Z)) (834.6737, 1, [M+H] <sup>+</sup> )                                                                                                                                                                                                                                      | Triacylglycerols                                  | Glycerolipids                    |
| 832.2347   | 3.39   | 0.0019         |                                                                                                                                                                                                                                                                                                                                      |                                                   |                                  |
| 722.4695   | 2.70   | 0.0025         | Several CL, ex: CL(14:0/18:0/18:4(6Z,9Z,12Z,15Z)/20:4(5Z,8Z,11Z,14Z)) (1420.9409, 1, [M+H+Na] <sup>+</sup> )/(1442.9253, 1, [M+2H] <sup>+</sup> )                                                                                                                                                                                    | Glycerophosphoglycerols                           | Glycerophospholipids             |
| 718.1740   | 3.35   | 0.0020         |                                                                                                                                                                                                                                                                                                                                      |                                                   |                                  |
| 703.5756   | 5.02   | 0.0222         | SM(d18:1/16:0) or SM(d18:0/16:1(9Z)) (702.5676, 1, [M+H] <sup>+</sup> )                                                                                                                                                                                                                                                              | Phosphosphingolipids                              | Sphingolipids                    |
| 1250.8136  | -2.64  | 0.0026         | Ganglioside GM3 (d18:1/20:0) (1208.7758, 3, [M+ACN+H] <sup>+</sup> )                                                                                                                                                                                                                                                                 | Glycosphingolipids                                | Sphingolipids                    |
| 1009.4497  | -2.51  | 0.0021         | Several PI, ex: PI(5-iso PGF2VI/20:2(11Z,14Z)) (932.5262, 4, [M+2K-H] <sup>+</sup> )                                                                                                                                                                                                                                                 | Glycerophosphoinositol                            | Glycerophospholipids             |
| 975.9969   | -2.94  | 0.0015         | Ganglioside GT2 (d18:1/14:0) (1908.9568, 2, [M+ACN+2H] <sup>+</sup> )                                                                                                                                                                                                                                                                | Glycosphingolipids                                | Sphingolipids                    |
| 953.7735   | -2.76  | 0.0009         | Several TG, ex: TG(14:0/O-18:0/22:0) (876.8510, 4, [M+2K-H] <sup>+</sup> )                                                                                                                                                                                                                                                           | Triacylglycerols                                  | Glycerolipids                    |
| 853.7249   | -5.04  | 0.0424         | Several TG, ex: TG(16:0/14:0/20:2n6) (830.7363, 1, [M+Na] <sup>+</sup> )                                                                                                                                                                                                                                                             | Triacylglycerols                                  | Glycerolipids                    |
| 786.5051   | -2.46  | 0.0021         | Several PE, ex: PE(20:5(6E,8Z,11Z,14Z,17Z)-OH(5)/P-18:1(9Z)) (763.5152, 1, [M+Na] <sup>+</sup> ); Several PA(20:3(6,8,11)-OH(5)/22:6(4Z,7Z,10Z,13Z,16Z,19Z)) (786.4836, 1, [M+NH <sub>4</sub> -H <sub>2</sub> O] <sup>+</sup> ); Several PE-NMe2, ex: PE-NMe2(22:5(7Z,10Z,13Z,16Z,19Z)/14:1(9Z)) (763.5152, 1, [M+Na] <sup>+</sup> ) | Glycero-phosphoethanolamines<br>Glycerophosphates | Glycerophospholipids             |
| 757.4016   | -5.85  | 0.0191         | Several PA, ex: PA(PGJ2/i-15:0) (712.4315, 1, [M+2Na-H] <sup>+</sup> )                                                                                                                                                                                                                                                               | Glycerophosphate                                  | Glycerophospholipids             |
| 676.4232   | -2.67  | 0.0004         |                                                                                                                                                                                                                                                                                                                                      |                                                   |                                  |
| 429.2597   | -2.95  | 0.0027         | PA(LTE4/P-16:0) (815.4771, 1, [M+ACN+2H] <sup>+</sup> )                                                                                                                                                                                                                                                                              | Glycerophosphates                                 | Glycerophospholipids             |
| 325.2348   | -2.98  | 0.0019         | Several MG, ex: MG(i-14:0/0:0/0:0) or 1-monomyristoylglycerol (302.2457, 0, [M+Na] <sup>+</sup> )                                                                                                                                                                                                                                    | Monoacylglycerols                                 | Glycerolipids                    |

**Table S 6** Identification of statistically significant and enriched metabolites from exposed zebrafish larvae to K2 vitamin, in comparison with control samples, from general extraction. Is shown the putative identification ( $\Delta$  ppm < 5) chemical taxonomy (class and subclass) of the top 20 statistically significant and enriched compounds (p-value  $\leq$  0.05, with inclusion of all  $\log_2FC \geq 5$ ).

| <i>m/z</i> | Log2FC | <i>p-value</i> | K2 TREATMENT                                                                                                                                                                                                                                                                                                                                              |                                                                                  |                                                    |
|------------|--------|----------------|-----------------------------------------------------------------------------------------------------------------------------------------------------------------------------------------------------------------------------------------------------------------------------------------------------------------------------------------------------------|----------------------------------------------------------------------------------|----------------------------------------------------|
|            |        |                | Putative identification ( <i>m/z</i> , $\Delta$ ppm, adduct)                                                                                                                                                                                                                                                                                              | Chemical Taxonomy                                                                |                                                    |
|            |        |                |                                                                                                                                                                                                                                                                                                                                                           | Sub-Class                                                                        | Class                                              |
| 1162.4526  | 3.40   | 0.0041         | Several CDP-DG, ex: CDP-DG(22:6(4Z,7Z,11E,13Z,15E,19Z)-2OH(10S,17)/i-18:0) (1085.5354, 2, [M+2K-H] <sup>+</sup> )                                                                                                                                                                                                                                         | CDP-diacylglycerol                                                               | Glycerophospholipids                               |
| 1032.8555  | 5.70   | 0.0219         |                                                                                                                                                                                                                                                                                                                                                           |                                                                                  |                                                    |
| 942.4719   | 3.51   | 0.0033         | Several PS, ex: PS(TXB2/20:4(8Z,11Z,14Z,17Z)) (897.5003, 0, [M+2Na-H] <sup>+</sup> )                                                                                                                                                                                                                                                                      | Glycerophosphoserines                                                            | Glycerophospholipids                               |
| 936.2286   | 3.58   | 0.0043         | Phenylacetohydroximoyl-glutathione (436.1058, 1, [2M+ACN+Na] <sup>+</sup> )                                                                                                                                                                                                                                                                               | Oligopeptide                                                                     | Carboxylic acids and derivatives                   |
| 858.2619   | 4.56   | 0.0032         |                                                                                                                                                                                                                                                                                                                                                           |                                                                                  |                                                    |
| 854.5027   | 4.10   | 0.0032         | Several PS, ex: PS(TXB2/14:0) (821.4690, 0, [M+CH3OH+H] <sup>+</sup> )                                                                                                                                                                                                                                                                                    | Glycerophosphoserines                                                            | Glycerophospholipids                               |
| 821.5303   | 3.63   | 0.0046         | Several PA, ex: PA(20:4(8Z,11Z,14Z,17Z)-2OH(5S,6R)/i-21:0) (798.5411, 0, [M+Na] <sup>+</sup> )                                                                                                                                                                                                                                                            | Glycerophosphate                                                                 | Glycerophospholipids                               |
| 808.7408   | 2.99   | 0.0039         | Several TG, ex: TG(15:0/18:0/14:1(9Z)) (790.7050, 2, [M+NH4] <sup>+</sup> )                                                                                                                                                                                                                                                                               | Triacylglycerols                                                                 | Glycerolipids                                      |
| 327.2681   | 3.59   | 0.0025         | Becocalcidiol or 1-Phenyl-1,3-heptadecanedione (344.2715, 2, [M+H-H2O] <sup>+</sup> )                                                                                                                                                                                                                                                                     | Vitamin D and derivatives<br>Carbonyl compounds                                  | Steroids and derivatives<br>Organooxygen compounds |
| 267.1569   | 4.36   | 0.0019         | ( $\pm$ )-1,4-Nonanediol diacetate or 1,11-Undecanedicarboxylic acid or Menthyl ethylene glycol carbonate (244.1675, 1, [M+Na] <sup>+</sup> )                                                                                                                                                                                                             | Fatty alcohol esters/ Fatty acids and conjugates/ Monoterpenoids                 | Fatty Acyls<br>Prenol lipids                       |
| 1006.5254  | -2.29  | 0.0133         | PGP(LTE4/i-20:0) (1041.5377, 0, [M+H-2H2O] <sup>+</sup> )                                                                                                                                                                                                                                                                                                 | Phospho-glycerophosphate                                                         | Glycerophospholipids                               |
| 929.5135   | -1.98  | 0.0087         | Several PI, ex: PI(18:1(9Z)/20:4(5Z,8Z,11Z,14Z)) (884.5415, 1, [M+2Na-H] <sup>+</sup> )                                                                                                                                                                                                                                                                   | Glycerophosphoinositol                                                           | Glycerophospholipids                               |
| 919.7470   | -2.43  | 0.0163         | Several TG, ex: TG(15:0/20:5(5Z,8Z,11Z,14Z,17Z)/16:1(9Z)) (836.6894, 3, [M+2ACN+H] <sup>+</sup> )                                                                                                                                                                                                                                                         | Triacylglycerols                                                                 | Glycerolipids                                      |
| 912.5258   | -2.13  | 0.0164         | Several PI, ex: PI(18:3(9Z,11Z,15)-OH(13)/18:3(9Z,12Z,15Z)) (870.4894, 3, [M+ACN+H] <sup>+</sup> )/(912.50, 3, [M+NH4-H2O] <sup>+</sup> )/(894.4894, 3, [M+NH4] <sup>+</sup> );<br>Several PE-NMe, ex: PE-NMe(24:1(15Z)/18:4(6Z,9Z,12Z,15Z)) or<br>PC, ex: PC(22:5(7Z,10Z,13Z,16Z,19Z)/18:0) (835.6091, 3, [M+2K-H] <sup>+</sup> )                        | Glycerophosphoinositol<br>Glycero-phosphoethanolamines<br>Glycerophosphocholines | Glycerophospholipids                               |
| 907.5308   | -1.94  | 0.0073         | Several PI, ex: PI(18:1(9Z)/20:4(5Z,8Z,11Z,14Z)) (884.5415, 0, [M+Na] <sup>+</sup> )                                                                                                                                                                                                                                                                      | Glycerophosphoinositol                                                           | Glycerophospholipids                               |
| 881.5816   | -1.88  | 0.0186         | N-Eicosapentaenoyl Phenylalanine (449.2930, 1, [2M+H-H2O] <sup>+</sup> );<br>Several PA, ex: PA(22:5(7Z,10Z,13Z,16Z,19Z)/22:4(7Z,10Z,13Z,16Z)) (798.520, 1, [M+2ACN+H] <sup>+</sup> );<br>Several PE-NMe, ex: PE-NMe2(22:6(4Z,7Z,10Z,13Z,16Z,19Z)/22:6(4Z,7Z,10Z,13Z,16Z,19Z)) (863.5465, 1, [M+NH4] <sup>+</sup> / 839.5465, 1, [M+ACN+H] <sup>+</sup> ) | N-acylamides<br>Glycerophosphate/<br>Glycero-phosphoethanolamine                 | Fatty Acyls<br>Glycerophospholipids                |
| 837.9603   | -1.90  | 0.0114         | Ganglioside GD2 (d18:0/12:0) (1591.8457, 4, [M+2ACN+2H] <sup>+</sup> )                                                                                                                                                                                                                                                                                    | Glycosphingolipids                                                               | Sphingolipids                                      |
| 780.0296   | -2.31  | 0.0150         |                                                                                                                                                                                                                                                                                                                                                           |                                                                                  |                                                    |
| 756.0378   | -3.34  | 0.0242         |                                                                                                                                                                                                                                                                                                                                                           |                                                                                  |                                                    |

|                 |       |        |                                                                                                                    |                        |                      |
|-----------------|-------|--------|--------------------------------------------------------------------------------------------------------------------|------------------------|----------------------|
| <b>485.3255</b> | -2.35 | 0.0165 | <b>Several PC</b> , ex: PC(18:1(9Z)-O(12,13)/22:6(4Z,7Z,10Z,13Z,16Z,19Z)) (845.5571, 0, [M+3ACN+2H] <sup>+</sup> ) | Glycerophosphocholines | Glycerophospholipids |
|-----------------|-------|--------|--------------------------------------------------------------------------------------------------------------------|------------------------|----------------------|

**Table S 7** Identification of statistically significant and enriched metabolites from exposed zebrafish larvae to K3 vitamin, in comparison with control samples, from general extraction. Is shown the putative identification ( $\Delta$  ppm < 5) chemical taxonomy (class and subclass) of the top 20 statistically significant and enriched compounds (p-value  $\leq$  0.05, with inclusion of all  $\log_2FC \geq 5$ ).

| <i>m/z</i>       | Log2FC | <i>p-value</i> | K3 TREATMENT                                                                                                                                                                            |                                                                     |                                                    |
|------------------|--------|----------------|-----------------------------------------------------------------------------------------------------------------------------------------------------------------------------------------|---------------------------------------------------------------------|----------------------------------------------------|
|                  |        |                | Putative identification ( <i>m/z</i> , $\Delta$ ppm, adduct)                                                                                                                            | Chemical Taxonomy                                                   |                                                    |
|                  |        |                |                                                                                                                                                                                         | Sub-Class                                                           | Class                                              |
| <b>1249.6469</b> | 4.73   | 0.0121         | <b>Several PC</b> , ex: PC(20:4(7E,9E,11Z,13E)-3OH(5S,6R,15S)/2:0) (633.3278, 4, [2M+H-H <sub>2</sub> O] <sup>+</sup> )                                                                 | Glycerophosphocholines                                              | Glycerophospholipids                               |
| <b>1208.7731</b> | 2.31   | 0.0093         | <b>Several CL</b> , ex: CL(11:0/11:0/11:0/18:2(9Z,11Z)) (1166.7375, 1, [M+ACN+H] <sup>+</sup> )                                                                                         | Glycerophosphoglycerols                                             | Glycerophospholipids                               |
| <b>1151.5902</b> | 3.17   | 0.0099         | <b>Several CDP-DG</b> , ex: CDP-DG(TXB2/i-19:0) (1109.5566, 0, [M+ACN+H] <sup>+</sup> )                                                                                                 | CDP-diacylglycerol                                                  | Glycerophospholipids                               |
| <b>1049.0172</b> | 4.60   | 0.0019         | <b>Several TG</b> , ex: TG(i-18:0/i-24:0/22:0) (1030.9867, 3, [M+NH <sub>4</sub> ] <sup>+</sup> )                                                                                       | Triacylglycerols                                                    | Glycerolipids                                      |
| <b>1033.1215</b> | 4.48   | 0.0030         |                                                                                                                                                                                         |                                                                     |                                                    |
| <b>959.5078</b>  | 4.61   | 0.0029         | <b>Several PGP</b> , ex: PGP(20:3(8Z,11Z,14Z)-2OH(5,6)/22:5(7Z,10Z,13Z,16Z,19Z)) (958.4972, 3, [M+H] <sup>+</sup> / 976.5078, 3, [M+H- H <sub>2</sub> O] <sup>+</sup> )                 | Phospho-glycerophosphate                                            | Glycerophospholipids                               |
| <b>911.8023</b>  | 8.17   | 0.0332         | <b>Arachidyl carnitine</b> (455.3975, 0, [2M+H] <sup>+</sup> )                                                                                                                          | Fatty acid esters                                                   | Fatty Acyls                                        |
| <b>895.7716</b>  | 7.34   | 0.0287         | <b>Several TG</b> , ex: TG(17:0/18:1(9Z)/18:1(9Z)) (872.7833, 1, [M+Na] <sup>+</sup> )                                                                                                  | Triacylglycerols                                                    | Glycerolipids                                      |
| <b>841.4074</b>  | 3.07   | 0.0130         |                                                                                                                                                                                         |                                                                     |                                                    |
| <b>327.2679</b>  | 4.13   | 0.0023         | <b>Becocalcidiol or 1-Phenyl-1,3-heptadecanedione</b> (344.2715, 2, [M+H-H <sub>2</sub> O] <sup>+</sup> )                                                                               | Vitamin D and derivatives<br>Carbonyl compounds                     | Steroids and derivatives<br>Organooxygen compounds |
| <b>1052.7758</b> | -2.16  | 0.0172         |                                                                                                                                                                                         |                                                                     |                                                    |
| <b>1009.6254</b> | -2.80  | 0.0202         | <b>Several PGP</b> , ex: PGP(18:1(12Z)-O(9S,10R)/i-22:0) (926.5649, 0, [M+2ACN+H] <sup>+</sup> )                                                                                        | Phospho-glycerophosphate                                            | Glycerophospholipids                               |
| <b>987.7356</b>  | -2.90  | 0.0261         | <b>PC(PGF1alpha/24:0)</b> (945.7034, 2, [M+ACN+H] <sup>+</sup> )                                                                                                                        | Glycerophosphocholines                                              | Glycerophospholipids                               |
| <b>909.7732</b>  | -1.87  | 0.0291         | <b>Several TG</b> , ex: TG(15:0/22:4(7Z,10Z,13Z,16Z)/22:4(7Z,10Z,13Z,16Z)) (944.7833, 3, [M+H-2H <sub>2</sub> O] <sup>+</sup> )                                                         | Triacylglycerols                                                    | Glycerolipids                                      |
| <b>908.3902</b>  | -1.45  | 0.0231         | <b>PA(LTE4/i-16:0)</b> (831.4720, 1, [M+2K-H] <sup>+</sup> )                                                                                                                            | Glycerophosphate                                                    | Glycerophospholipids                               |
| <b>900.0516</b>  | -3.61  | 0.0068         |                                                                                                                                                                                         |                                                                     |                                                    |
| <b>873.5255</b>  | -1.90  | 0.0292         | <b>PG(18:1(12Z)-2OH(9,10)/20:1(11Z)/PG(20:1(11Z)/18:1(12Z)-2OH(9,10))</b> (834.5622, 0, [M+K] <sup>+</sup> ); <b>LysoPA(0:0/18:1(9Z)/DHAP(18:0)</b> (436.2590, 0, [2M+H] <sup>+</sup> ) | Phosphatidylglycerol/<br>lysoGlycerophosphate<br>Carbonyl compounds | Glycerophospholipids<br>Organooxygen compounds     |
| <b>855.8229</b>  | -2.36  | 0.0175         |                                                                                                                                                                                         |                                                                     |                                                    |
| <b>763.4058</b>  | -3.22  | 0.0286         | <b>PA(20:2(11Z,14Z)/15:0)</b> (686.4887, 2, [M+2K-H] <sup>+</sup> )                                                                                                                     | Glycerophosphate                                                    | Glycerophospholipids                               |
| <b>688.3939</b>  | -1.75  | 0.0257         |                                                                                                                                                                                         |                                                                     |                                                    |

**Table S 8** Identification of statistically significant and enriched metabolites from exposed zebrafish larvae to OH-PhQ vitamin, in comparison with control samples, from targeted extraction. Is shown the putative identification ( $\Delta$  ppm < 5) chemical taxonomy (class and subclass) of the top 20 statistically significant and enriched compounds (p-value  $\leq$  0.05, with inclusion of all  $\log_2FC \geq 5$ ).

| <i>m/z</i> | Log2FC | <i>p-value</i> | OH-PhQ TREATMENT                                                                                                                                            |                                              |                                       |
|------------|--------|----------------|-------------------------------------------------------------------------------------------------------------------------------------------------------------|----------------------------------------------|---------------------------------------|
|            |        |                | Putative identification ( <i>m/z</i> , $\Delta$ ppm, adduct)                                                                                                | Chemical Taxonomy<br>Sub-Class               | Class                                 |
| 2417.6934  | 5.39   | 0.0183         |                                                                                                                                                             |                                              |                                       |
| 1656.2165  | 5.59   | 0.0481         | Several PC, ex: PC(20:3(8Z,11Z,14Z)-2OH(5,6)/P-18:0) (827.6040, 1, [2M+H] <sup>+</sup> )                                                                    | Glycerophosphocholines                       | Glycerophospholipids                  |
| 1325.9446  | 5.56   | 0.0061         | Several CL, ex: CL(14:0/18:0/16:0/14:0) (1324.9409, 3, [M+H] <sup>+</sup> )                                                                                 | Glycerophosphoglycerols                      | Glycerophospholipids                  |
| 934.6998   | 3.28   | 0.0002         | Several PE-NMe, ex: PE-NMe2(22:2(13Z,16Z)/20:2(11Z,14Z)) (851.6404, 1, [M+2ACN+H] <sup>+</sup> )                                                            | Glycero-phosphoethanolamines                 | Glycerophospholipids                  |
| 804.6860   | 3.18   | 0.0002         | PC(O-18:0/20:0) (803.6768, 2, [M+H] <sup>+</sup> )                                                                                                          | Glycerophosphocholines                       | Glycerophospholipids                  |
| 672.6181   | 4.02   | 9.1e-05        |                                                                                                                                                             |                                              |                                       |
| 640.5068   | 5.69   | 0.0017         | Abietinol (288.2453, 1, [2M+ACN+Na] <sup>+</sup> ) or several PE, ex: PE(P-18:0/14:0) (675.5203, 1, [M+H-2H2O] <sup>+</sup> )                               | Diterpenoids<br>Glycero-phosphoethanolamines | Prenol lipids<br>Glycerophospholipids |
| 621.6671   | 3.93   | 2.9e-05        |                                                                                                                                                             |                                              |                                       |
| 619.6227   | 5.04   | 0.0035         |                                                                                                                                                             |                                              |                                       |
| 617.5228   | 5.03   | 0.0046         | (4E,14Z)-2-Aminooctadeca-4,14-diene-1,3-diol or Palmitoleoylethanolamide (297.2668, 0, [2M+Na] <sup>+</sup> )                                               | Amines                                       | Organonitrogen compounds              |
| 467.3508   | 3.28   | 0.0002         | Several TG, ex: TG(15:0/22:6(4Z,7Z,10Z,13Z,16Z,19Z)/20:5(5Z,8Z,11Z,14Z,17Z)) (910.7050, 0, [M+H+Na] <sup>+</sup> )                                          | Triacylglycerols                             | Glycerolipids                         |
| 2204.9409  | -2.02  | 0.0029         |                                                                                                                                                             |                                              |                                       |
| 1686.2109  | -5.52  | 0.0071         | Several PA, ex: PA(20:3(8Z,11Z,14Z)-2OH(5,6)/i-24:0) (842.6037, 2, [2M+H] <sup>+</sup> )                                                                    | Glycerophosphates                            | Glycerophospholipids                  |
| 1501.6116  | -7.16  | 0.0004         |                                                                                                                                                             |                                              |                                       |
| 1485.5093  | -6.57  | 0.0024         |                                                                                                                                                             |                                              |                                       |
| 1188.8759  | -9.45  | 0.0014         | Menaquinone 6 (580.4280, 3, [2M+2H+3H2O] <sup>+</sup> )                                                                                                     | Sesterterpenoids                             | Prenol lipid                          |
| 1161.3302  | -6.13  | 0.0075         |                                                                                                                                                             |                                              |                                       |
| 1137.0502  | -3.37  | 0.0017         | Several TG, ex: TG(i-24:0/21:0/i-22:0) (1073.0337, 1, [M+ACN+Na] <sup>+</sup> )                                                                             | Triacylglycerols                             | Glycerolipids                         |
| 1058.1166  | -2.99  | 0.0032         |                                                                                                                                                             |                                              |                                       |
| 733.5906   | -2.09  | 0.0028         |                                                                                                                                                             |                                              |                                       |
| 541.1247   | -2.71  | 0.0013         | Estriol-17-glucuronide/ 15-Hydroxynorandrostene-3,17-dione glucuronide/ Estriol-3-glucuronide/ Estriol-16-Glucuronide (464.2046, 2, [M+2K-H] <sup>+</sup> ) | Steroidal glycosides                         | Steroids and derivatives              |

**Table S 9** Identification of statistically significant and enriched metabolites from exposed zebrafish larvae to K1 vitamin, in comparison with control samples, from targeted extraction. Is shown the putative identification ( $\Delta$  ppm < 5) chemical taxonomy (class and subclass) of the top 20 statistically significant and enriched compounds (p-value  $\leq$  0.05, with inclusion of all  $\log_2FC \geq 5$ ).

| <i>m/z</i> | Log2FC | <i>p-value</i> | K1 TREATMENT                                                                                                                                                                                                                                                      |                                                                      |                      |
|------------|--------|----------------|-------------------------------------------------------------------------------------------------------------------------------------------------------------------------------------------------------------------------------------------------------------------|----------------------------------------------------------------------|----------------------|
|            |        |                | Putative identification ( <i>m/z</i> , $\Delta$ ppm, adduct)                                                                                                                                                                                                      | Chemical Taxonomy                                                    |                      |
|            |        |                |                                                                                                                                                                                                                                                                   | Sub-Class                                                            | Class                |
| 1543.1661  | 5.14   | 0.0005         |                                                                                                                                                                                                                                                                   |                                                                      |                      |
| 1492.5972  | 5.71   | 0.0228         |                                                                                                                                                                                                                                                                   |                                                                      |                      |
| 1487.5248  | 6.64   | 0.0482         |                                                                                                                                                                                                                                                                   |                                                                      |                      |
| 1450.0857  | 5.07   | 0.0161         |                                                                                                                                                                                                                                                                   |                                                                      |                      |
| 907.5211   | 5.55   | 0.0164         | Several PE, ex:<br>PE(20:4(8Z,11Z,14Z,17Z)-2OH(5S,6R)/22:6(4Z,7Z,10Z,13Z,16Z,19Z)) (843.5050, 0, [M+ACN+Na] <sup>+</sup> ) or<br>several PGP, ex:<br>PGP(18:3(9Z,12Z,15Z)/16:0) (824.4605, 0, [M+2ACN+H] <sup>+</sup> )                                           | Glycero-phosphoethanolamines<br>Glycerophospho-glycerophosphates     | Glycerophospholipids |
| 879.5849   | 2.90   | 0.0007         | Several PC, ex:<br>PC(20:4(8Z,11Z,14Z,17Z)-2OH(5S,6R)/DiMe(9,5)) or PS, ex:<br>PS(20:4(5Z,7E,11Z,14Z)-OH(9)/22:2(13Z,16Z)) (879.5625, 0, [M+NH4-H2O] <sup>+</sup> ); Several PA, ex:<br>PA(24:1(15Z)/22:4(7Z,10Z,13Z,16Z)) (834.6139, 0, [M+2Na-H] <sup>+</sup> ) | Glycerophosphocholines<br>Glycerophosphoserines<br>Glycerophosphates | Glycerophospholipid  |
| 489.3337   | 3.00   | 0.0006         | Vitamin K1 2,3-epoxide (466.3447, 0, [M+Na] <sup>+</sup> )                                                                                                                                                                                                        | Quinone and hydroquinone lipids                                      | Prenol lipid         |
| 473.3390   | 3.92   | 0.0009         | Vitamin K1 (450.3498, 0, [M+Na] <sup>+</sup> )                                                                                                                                                                                                                    |                                                                      |                      |
| 451.3568   | 2.96   | 0.0006         | Vitamin K1 (450.3498, 0, [M+H] <sup>+</sup> )                                                                                                                                                                                                                     |                                                                      |                      |
| 228.3215   | 3.11   | 0.0004         |                                                                                                                                                                                                                                                                   |                                                                      |                      |
| 1991.9123  | -5.53  | 0.0077         | Several CDP-DG, ex: CDP-DG(5-iso PGF2VI/i-14:0) (995.4521, 0, [2M+H] <sup>+</sup> ) or several PIP, ex: PIP(5-iso PGF2VI/18:2(9Z,12Z)) (984.4613, 0, [2M+Na] <sup>+</sup> )                                                                                       | CDP-diacylglycerol<br>Glycerophosphoinositol phosphates              | Glycerophospholipid  |
| 1633.2922  | -5.95  | 0.0048         |                                                                                                                                                                                                                                                                   |                                                                      |                      |
| 1632.1957  | -2.39  | 0.0086         | SM(d18:0/PGF1alpha) ( 804.5993, 5, [2M+Na] <sup>+</sup> )                                                                                                                                                                                                         | Phosphosphingolipids                                                 | Sphingolipids        |
| 1599.1587  | -2.89  | 0.0143         | Several SM, ex:<br>SM(d19:1/20:5(6E,8Z,11Z,14Z,17Z)-OH(5)) (790.5625, 0, [2M+NH4] <sup>+</sup> )                                                                                                                                                                  | Phosphosphingolipids                                                 | Sphingolipids        |
| 1345.9587  | -8.32  | 0.0245         | Several CL, ex: CL(i-15:0/i-16:0/i-16:0/18:2(9Z,11Z)) (1362.9566, 4, [M+H-H2O] <sup>+</sup> ) or several PA, ex: PA(18:1(9Z)-O(12,13)/P-16:0) (672.4730, 4, [2M+H] <sup>+</sup> )                                                                                 | Glycerophosphoglycerols<br>Glycerophosphates                         | Glycerophospholipid  |
| 1342.0658  | -3.28  | 0.0031         |                                                                                                                                                                                                                                                                   |                                                                      |                      |
| 1056.7334  | -2.89  | 0.0134         | 35S-Methylokadaic acid 7-hexadecanoate (1056.7113, 1, [M+NH4-H2O] <sup>+</sup> )                                                                                                                                                                                  | Fatty acid esters                                                    | Fatty Acyls          |
| 1043.7226  | -1.93  | 0.0081         | Several TG, ex:<br>TG(22:5(4Z,7Z,10Z,13Z,16Z)/22:6(4Z,7Z,10Z,13Z,16Z,19Z)/O-18:0) (966.8040, 0, [M+2K-H] <sup>+</sup> )                                                                                                                                           | Triacylglycerols                                                     | Glycerolipids        |
| 906.6184   | -2.19  | 0.0083         | Several PC, ex: PC(18:1(12Z)-2OH(9,10)/22:3(10Z,13Z,16Z)) or PE, ex: PE(20:3(8Z,11Z,14Z)-2OH(5,6)/24:1(15Z)) (883.6302, 1, [M+Na] <sup>+</sup> )/ (861.6459, 1, [M+2Na-H] <sup>+</sup> )                                                                          | Glycerophosphocholines<br>Glycerophospho-ethanolamines               | Glycerophospholipid  |
| 566.8889   | -2.04  | 0.0061         |                                                                                                                                                                                                                                                                   |                                                                      |                      |

**Table S 10** Identification of statistically significant and enriched metabolites from exposed zebrafish larvae to K2 vitamin, in comparison with control samples, from targeted extraction. Is shown the putative identification ( $\Delta$  ppm < 5) chemical taxonomy (class and subclass) of the top 20 statistically significant and enriched compounds ( $p$ -value  $\leq 0.05$ , with inclusion of all  $\log_2FC \geq 5$ ).

| <i>m/z</i> | Log2FC | <i>p</i> -value | K2 TREATMENT<br>Putative identification ( <i>m/z</i> , $\Delta$ ppm, adduct)                                                                                                                                                                         | Chemical Taxonomy                                                   |                                           |
|------------|--------|-----------------|------------------------------------------------------------------------------------------------------------------------------------------------------------------------------------------------------------------------------------------------------|---------------------------------------------------------------------|-------------------------------------------|
|            |        |                 |                                                                                                                                                                                                                                                      | Sub-Class                                                           | Class                                     |
| 1526.1966  | 4.56   | 4.1e-05         |                                                                                                                                                                                                                                                      |                                                                     |                                           |
| 1216.8208  | 2.36   | 0.0009          |                                                                                                                                                                                                                                                      |                                                                     |                                           |
| 1197.3455  | 5.05   | 0.0053          |                                                                                                                                                                                                                                                      |                                                                     |                                           |
| 1097.0196  | 3.06   | 0.0012          | Several TG, ex:<br>TG(20:3(5Z,8Z,11Z)/24:0/24:1(15Z))<br>(1078.9867, 1, [M+NH <sub>4</sub> ] <sup>+</sup> )                                                                                                                                          | Triacylglycerols                                                    | Glycerolipids                             |
| 741.2443   | 9.08   | 0.0044          |                                                                                                                                                                                                                                                      |                                                                     |                                           |
| 581.3645   | 2.09   | 0.0031          | (N-Acetylglucosaminy)2-<br>diphosphodolichol (1675.1192, 4,<br>[M+3Na] <sup>+</sup> )                                                                                                                                                                | Polyprenol                                                          | Prenol lipid                              |
| 505.3290   | 2.33   | 0.0028          | Several PA, ex: PA(8:0/i-15:0)<br>(522.3322, 1, [M+H-H <sub>2</sub> O] <sup>+</sup> )                                                                                                                                                                | Glycerophosphates                                                   | Glycerophospholipid                       |
| 483.2880   | 6.03   | 0.0009          | Menatetrenone Epoxide (460.2977, 2,<br>[M+Na] <sup>+</sup> )                                                                                                                                                                                         | Quinone and<br>hydroquinone lipids                                  | Prenol lipid                              |
| 449.3410   | 2.37   | 0.0028          | Vitamin K1 2,3-epoxide (466.3447, 2,<br>[M+H-H <sub>2</sub> O] <sup>+</sup> )                                                                                                                                                                        |                                                                     |                                           |
| 443.2940   | 4.50   | 0.0022          | Menatetrenone Epoxide (460.2977, 2,<br>[M+H-H <sub>2</sub> O] <sup>+</sup> )                                                                                                                                                                         |                                                                     |                                           |
| 1796.5906  | -1.36  | 0.0069          | 1-Tetradecanoyl-2-(9Z,12Z-<br>octadecadienoyl)-3-docosanoyl-sn-<br>glycerol or several TG, ex:<br>TG(16:0/18:1(11Z)/20:1(11Z))<br>(886.7989, 2, [2M+Na <sup>9+</sup> ])                                                                              | Triacylglycerols                                                    | Glycerolipids                             |
| 1533.2042  | -3.34  | 0.0038          |                                                                                                                                                                                                                                                      |                                                                     |                                           |
| 1508.4997  | -5.14  | 0.0005          |                                                                                                                                                                                                                                                      |                                                                     |                                           |
| 1252.0833  | -3.35  | 0.0002          |                                                                                                                                                                                                                                                      |                                                                     |                                           |
| 1165.8175  | -5.11  | 0.0077          | (3S,3'R,5R,6R)-7',8'-Didehydro-3,6-<br>epoxy-5,6-dihydro-beta,beta-carotene-<br>3',5'-diol (582.4073, 4, [2M+H] <sup>+</sup> )                                                                                                                       | Triterpenoids                                                       | Prenol lipids                             |
| 857.7955   | -3.55  | 0.0004          | Several TG, ex: TG(15:0/O-<br>18:0/20:3(5Z,8Z,11Z)) (856.7884, 0,<br>[M+H] <sup>+</sup> )                                                                                                                                                            | Triacylglycerols                                                    | Glycerolipids                             |
| 760.7156   | -2.74  | 0.0005          | Ganglioside GT1c/GT1b (d18:0/24:0)<br>(2213.1818, 1, [M+3Na] <sup>+</sup> ) or Several<br>DG/TG, ex: DG(22:1n9/0:0/24:1n9) /<br>TG(14:1(9Z)/14:1(9Z)/O-18:0)<br>(760.6945, 2, [M+NH <sub>4</sub> -H <sub>2</sub> O] <sup>+</sup> )                   | Glycosphingolipids<br>Diacylglycerols/<br>Triacylglycerols          | Sphingolipids<br>Glycerolipids            |
| 723.0493   | -5.33  | 0.0057          |                                                                                                                                                                                                                                                      |                                                                     |                                           |
| 544.8932   | -2.80  | 0.0002          | Deoxyuridine triphosphate (467.9736,<br>1, [M+2K-H] <sup>+</sup> )                                                                                                                                                                                   | Pyrimidine<br>deoxyribonucleotides                                  | Pyrimidine nucleotides                    |
| 429.3724   | -3.33  | 7.1e-05         | Cholesteryl acetate or 3-<br>Hydroxystigmast-5-en-7-one/ 6beta-<br>Hydroxystigmast-4-en-3-one/ 5alpha-<br>Stigmastan-3,6-dione or 4alpha-<br>Hydroxymethyl-4beta-methyl-5alpha-<br>cholesta-8,24-dien-3beta-ol (428.3654,<br>1, [M+H] <sup>+</sup> ) | Steroid esters/<br>Stigmastanes and<br>derivatives<br>Triterpenoids | Steroids and derivatives<br>Prenol lipids |

**Table S 11** Identification of statistically significant and enriched metabolites from exposed zebrafish larvae to K3 vitamin, in comparison with control samples, from targeted extraction. Is shown the putative identification ( $\Delta$  ppm < 5) chemical taxonomy (class and subclass) of the top 20 statistically significant and enriched compounds (p-value  $\leq$  0.05, with inclusion of all  $\log_2FC \geq 5$ ).

| <i>m/z</i>       | Log2FC | <i>p-value</i> | Putative identification ( <i>m/z</i> , $\Delta$ ppm, adduct)                                                                                                                                                                                                                                                                                                                                                  | Chemical Taxonomy                                                                               |                                                                            |
|------------------|--------|----------------|---------------------------------------------------------------------------------------------------------------------------------------------------------------------------------------------------------------------------------------------------------------------------------------------------------------------------------------------------------------------------------------------------------------|-------------------------------------------------------------------------------------------------|----------------------------------------------------------------------------|
|                  |        |                |                                                                                                                                                                                                                                                                                                                                                                                                               | Sub-Class                                                                                       | Class                                                                      |
| <b>2003.9208</b> | 5.91   | 0.0042         |                                                                                                                                                                                                                                                                                                                                                                                                               |                                                                                                 |                                                                            |
| <b>1970.9402</b> | 5.66   | 0.0169         | <b>PGP(LTE4/i-15:0)</b> (971.4595, 1, [2M+2H+3H <sub>2</sub> O] <sup>+</sup> )                                                                                                                                                                                                                                                                                                                                | Phospho-glycerophosphate                                                                        | Glycerophospholipid                                                        |
| <b>1463.1588</b> | 6.61   | 0.0254         | <b>Several PC</b> , ex: PC(O-16:0/16:1(9Z)) (717.5672, 1, [2M+2H+3H <sub>2</sub> O] <sup>+</sup> )                                                                                                                                                                                                                                                                                                            | Glycerophosphocholines                                                                          | Glycerophospholipid                                                        |
| <b>911.5614</b>  | 4.06   | 0.0007         | <b>Several PG</b> , ex: PG(20:4(7E,9E,11Z,13E)-3OH(5S,6R,15S)/i-21:0) (888.5728, 1, [M+Na] <sup>+</sup> )                                                                                                                                                                                                                                                                                                     | Phosphatidylglycerol                                                                            | Glycerophospholipids                                                       |
| <b>801.5429</b>  | 3.01   | 0.0005         | <b>Several PA</b> , ex: PA(22:6(4Z,7Z,10Z,13Z,16Z,19Z)/22:2(13Z,16Z)) (800.5356, 0, [M+H] <sup>+</sup> )                                                                                                                                                                                                                                                                                                      | Glycerophosphates                                                                               | Glycerophospholipids                                                       |
| <b>763.6599</b>  | 7.58   | 0.0014         | <b>1-Tetradecanoyl-2-(9Z-tetradecenoyl)-3-(8Z,11Z,14Z-eicosatrienoyl)-sn-glycerol</b> or <b>several TG</b> , ex: TG(16:0/14:1(9Z)/18:3(9Z,12Z,15Z)) (798.6737, 1, [M+H-2H <sub>2</sub> O] <sup>+</sup> )                                                                                                                                                                                                      | Triacylglycerols                                                                                | Glycerolipids                                                              |
| <b>612.5562</b>  | 2.19   | 0.0002         | <b>Several DG</b> , ex: DG(18:0/0:0/16:1n7) (594.5223, 0, [M+NH <sub>4</sub> ] <sup>+</sup> )                                                                                                                                                                                                                                                                                                                 | Diracylglycerols                                                                                | Glycerolipids                                                              |
| <b>525.3289</b>  | 3.00   | 0.0006         | <b>1-Stearoylglycerophosphoserine</b> or <b>LysoPS(18:0/0:0)</b> (525.3067, 1, [M+NH <sub>4</sub> -H <sub>2</sub> O] <sup>+</sup> )                                                                                                                                                                                                                                                                           | Glycerophosphoserine lyso-Glycerophosphoserine                                                  | Glycerophospholipids                                                       |
| <b>483.2878</b>  | 4.94   | 0.0012         | <b>PC(LTE4/20:4(8Z,11Z,14Z,17Z))</b> (964.5612, 0, [M+2H] <sup>+</sup> ) or <b>several long-chain FA</b> , ex: tetradeca-2,4,6-trienoic acid (222.1620, 1, [2M+K] <sup>+</sup> ) or <b>MG(0:0/24:6(6Z,9Z,12Z,15Z,18Z,21Z)/0:0)</b> or <b>5,9-Epidioxysterogosta-7,22-diene-3,6-diol/ 5,6-Epoxyergosta-8,22-diene-3,7,14-triol/ 5,9-Epidioxy-3-hydroxyergost-7-en-6-one</b> (444.3240, 1, [M+K] <sup>+</sup> ) | Glycerophosphocholines<br>Fatty acids and conjugates<br>Monoacylglycerols<br>Ergostane steroids | Glycerophospholipids<br>Acyls<br>Glycerolipids<br>Steroids and derivatives |
| <b>255.1930</b>  | 2.99   | 0.0005         |                                                                                                                                                                                                                                                                                                                                                                                                               |                                                                                                 |                                                                            |
| <b>1531.4928</b> | -5.13  | 0.0073         |                                                                                                                                                                                                                                                                                                                                                                                                               |                                                                                                 |                                                                            |
| <b>1501.6112</b> | -7.77  | 0.0005         |                                                                                                                                                                                                                                                                                                                                                                                                               |                                                                                                 |                                                                            |
| <b>1252.0833</b> | -3.57  | 0.0070         |                                                                                                                                                                                                                                                                                                                                                                                                               |                                                                                                 |                                                                            |
| <b>1188.8762</b> | -5.71  | 0.0045         | <b>Menaquinone 6</b> (580.4280, 3, [2M+2H+3H <sub>2</sub> O] <sup>+</sup> )                                                                                                                                                                                                                                                                                                                                   | Sesterterpenoids                                                                                | Prenol lipids                                                              |
| <b>1150.9275</b> | -2.12  | 0.0026         |                                                                                                                                                                                                                                                                                                                                                                                                               |                                                                                                 |                                                                            |
| <b>1021.0217</b> | -4.54  | 0.0015         |                                                                                                                                                                                                                                                                                                                                                                                                               |                                                                                                 |                                                                            |
| <b>802.5925</b>  | -3.32  | 0.0042         | <b>Several PC</b> , ex: PC(18:1(12Z)-2OH(9,10)/P-18:1(9Z)) (801.5884, 4, [M+H] <sup>+</sup> ) or <b>several PA</b> , ex: PA(i-21:0/20:3(6,8,11)-OH(5)) (784.5618, 4, [M+NH <sub>4</sub> ] <sup>+</sup> )                                                                                                                                                                                                      | Glycerophosphocholines<br>Glycerophosphates                                                     | Glycerophospholipids                                                       |
| <b>735.5959</b>  | -2.12  | 0.0024         | <b>N-Myristoyl Lysine</b> (356.3039, 2, [2M+Na] <sup>+</sup> )                                                                                                                                                                                                                                                                                                                                                | Peptide                                                                                         | Carboxylic acids and derivatives                                           |
| <b>722.3889</b>  | -1.99  | 0.0041         |                                                                                                                                                                                                                                                                                                                                                                                                               |                                                                                                 |                                                                            |
| <b>255.1929</b>  | -2.23  | 0.0021         |                                                                                                                                                                                                                                                                                                                                                                                                               |                                                                                                 |                                                                            |
